# Supplementary material for: Formation of cyanates in low-valent uranium chemistry: a synergistic experimental/theoretical study
Source: Royal Society of Chemistry journal article supplement (doi:10.1039/c4dt00618f), 2014-01-01
Supplement: c4dt00618f1.pdf [file c4dt00618f1.pdf]

- *Electronic Supplementary Information* -

Formation of cyanate in low-valent uranium chemistry: A synergistic  
experimental/theoretical study

Christos E. Kefalidis,<sup>[a]</sup> Alistair S. P. Frey,<sup>[b]</sup> S. Mark Roe,<sup>[b]</sup> F. Geoffrey N. Cloke,<sup>\*[b]</sup>  
and Laurent Maron<sup>\*[a]</sup>

<sup>a</sup> Université de Toulouse et CNRS, INSA, UPS, UMR 5215, LPCNO, 135 Avenue de  
Rangueil, F-31077 Toulouse, France.

<sup>b</sup> Department of Chemistry, School of Life Sciences, University of Sussex, Brighton,  
BN1 9QJ, UK.

**Table of Contents**

|                                                        |   |
|--------------------------------------------------------|---|
| Table of X-ray Structure Parameters for <b>3</b> ..... | 2 |
| Theoretical Data and Results .....                     | 3 |

Table S1. Crystal data and structure refinement for [U(1,4-{SiPr<sub>3</sub>}<sub>2</sub>C<sub>8</sub>H<sub>6</sub>)Cp\*]<sub>2</sub>(NCO) **3**.

|                                   |                                                                     |                 |
|-----------------------------------|---------------------------------------------------------------------|-----------------|
| Empirical formula                 | C <sub>73</sub> H <sub>126</sub> N O Si <sub>4</sub> U <sub>2</sub> |                 |
| Formula weight                    | 1622.16                                                             |                 |
| Temperature                       | 173(2) K                                                            |                 |
| Wavelength                        | 0.71073 Å                                                           |                 |
| Crystal system                    | Triclinic                                                           |                 |
| Space group                       | P $\bar{1}$ (No.2)                                                  |                 |
| Unit cell dimensions              | a = 13.5419(2) Å                                                    | α = 78.856(1)°. |
|                                   | b = 20.2254(3) Å                                                    | β = 87.152(1)°. |
|                                   | c = 28.0988(4) Å                                                    | γ = 89.406(1)°. |
| Volume                            | 7541.55(19) Å <sup>3</sup>                                          |                 |
| Z                                 | 2                                                                   |                 |
| Density (calculated)              | 1.429 Mg/m <sup>3</sup>                                             |                 |
| Absorption coefficient            | 4.392 mm <sup>-1</sup>                                              |                 |
| F(000)                            | 3276.4                                                              |                 |
| Crystal size                      | 0.14 x 0.10 x 0.07 mm <sup>3</sup>                                  |                 |
| Theta range for data collection   | 3.39 to 26.73°.                                                     |                 |
| Reflections collected             | 31667                                                               |                 |
| Independent reflections           | 21950 [R(int) = 0.0553]                                             |                 |
| Completeness to theta = 26.73°    | 98.9 %                                                              |                 |
| Absorption correction             | Semi-empirical from equivalents                                     |                 |
| Max. and min. transmission        | 0.735 and 0.596                                                     |                 |
| Refinement method                 | Full-matrix least-squares on F <sup>2</sup>                         |                 |
| Data / restraints / parameters    | 31667 / 12 / 1461                                                   |                 |
| Goodness-of-fit on F <sup>2</sup> | 1.013                                                               |                 |
| Final R indices [I > 2σ(I)]       | R1 = 0.0553, wR2 = 0.1056                                           |                 |
| R indices (all data)              | R1 = 0.098, wR2 = 0.1193                                            |                 |

Due to disorder, the bond lengths and angles associated with the bridging isocyanate group are unreliable.

Data collection KappaCCD , Program package WinGX , Abs correction MULTISCAN  
Refinement using SHELXL-97 , Drawing using ORTEP-3 for Windows

## Theoretical Data and Results

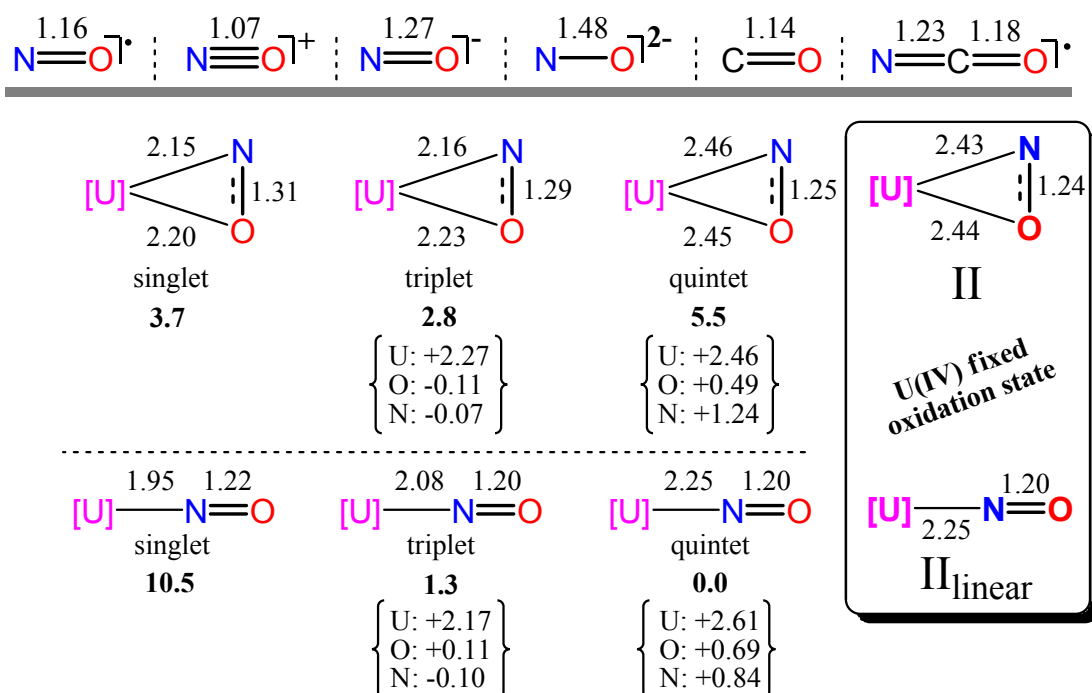

**Scheme S1.** Geometrical features of the  $\text{NO}\cdot$ ,  $\text{NO}^+$ ,  $\text{NO}^-$ ,  $\text{NO}_2^-$ ,  $\text{CO}$ , and  $\text{NCO}\cdot$  free molecules, along with all the spin state combinations for the two different bonding modes of the  $\text{NO}$  substrate on intermediate **II**. Numbers in bold refer to relative enthalpy energies in  $\text{kcal}\cdot\text{mol}^{-1}$ . All given bond lengths are in angstroms. The figures in braces correspond to the Mulliken atomic spin densities.

### Cartesian coordinates and enthalpy energies.

**I** (small core, quartet)

H= -1186.411491 au

|    |             |             |            |
|----|-------------|-------------|------------|
| U  | 0.15994600  | -2.26845500 | 5.44798900 |
| C  | 2.77960000  | -2.29745000 | 5.94260800 |
| C  | 2.15503500  | -2.93267200 | 7.05734600 |
| C  | 1.20515200  | -3.96672500 | 7.22766300 |
| C  | 0.42340800  | -4.76323500 | 6.36092500 |
| C  | 0.25874200  | -4.86677100 | 4.95939200 |
| C  | 0.85359600  | -4.25654800 | 3.81471900 |
| C  | 1.88210600  | -3.28051000 | 3.66770700 |
| C  | 2.66544800  | -2.48403900 | 4.53352500 |
| C  | -1.11584000 | -0.03212400 | 6.20373000 |
| C  | -1.68565000 | -1.03017100 | 7.04886700 |
| C  | -1.54580200 | -0.29485900 | 4.86445300 |
| C  | -2.38328800 | -1.45128200 | 4.89131900 |
| C  | -2.46492500 | -1.90382400 | 6.23817600 |
| H  | 2.05026000  | -2.99932300 | 2.62801400 |
| H  | 3.26010800  | -1.76876200 | 3.96533500 |
| Si | 4.04336000  | -0.98545800 | 6.43258100 |
| H  | 4.13487200  | 0.07902700  | 5.38263700 |
| H  | 2.43362900  | -2.49098200 | 8.01300600 |
| H  | 0.94775700  | -4.11968000 | 8.27360000 |
| H  | -0.29364000 | -5.37724700 | 6.90168500 |
| H  | -0.55670800 | -5.54285500 | 4.70764400 |
| H  | 1.01935000  | -6.04520300 | 1.65501700 |

|    |             |             |            |
|----|-------------|-------------|------------|
| Si | 0.19129900  | -4.90896000 | 2.17335500 |
| H  | 0.20607900  | -3.83385500 | 1.12998000 |
| H  | -1.21047700 | -5.40885500 | 2.33736700 |
| C  | -3.28465000 | -3.05990900 | 6.73379200 |
| C  | -3.11866700 | -2.02960700 | 3.71563300 |
| C  | -1.26513200 | 0.56650700  | 3.66459100 |
| C  | -1.55902800 | -1.09813100 | 8.54435800 |
| C  | -0.31577500 | 1.15848600  | 6.65378300 |
| H  | 5.41250800  | -1.57166600 | 6.59769800 |
| H  | 3.66498000  | -0.35223700 | 7.73602100 |
| H  | -3.33289400 | -3.09438600 | 3.84821000 |
| H  | -4.08204900 | -1.52518300 | 3.56098600 |
| H  | -2.55542900 | -1.92529900 | 2.78196300 |
| H  | -3.40873900 | -3.83232800 | 5.96850200 |
| H  | -2.83060200 | -3.53687100 | 7.60830500 |
| H  | -4.29137600 | -2.73695100 | 7.03062700 |
| H  | -1.60906600 | -2.12770600 | 8.91302800 |
| H  | -0.61466500 | -0.67090800 | 8.89664600 |
| H  | -2.36553500 | -0.54041800 | 9.03918900 |
| H  | 0.38159800  | 1.50398700  | 5.88298500 |
| H  | -0.96712000 | 2.01009700  | 6.89353700 |
| H  | 0.27212600  | 0.94551400  | 7.55253600 |
| H  | -1.31720500 | -0.00116600 | 2.72958600 |
| H  | -1.99219000 | 1.38554600  | 3.57841800 |
| H  | -0.27382900 | 1.03170000  | 3.70978100 |

#### I (large core)

H= -741.196141 au

|    |             |             |            |
|----|-------------|-------------|------------|
| U  | 0.08832600  | -2.41670200 | 5.55095500 |
| C  | 2.84120700  | -2.20340400 | 5.63698300 |
| C  | 2.46454900  | -2.79281200 | 6.88087900 |
| C  | 1.65692400  | -3.88560000 | 7.27956000 |
| C  | 0.85865700  | -4.84721000 | 6.61043500 |
| C  | 0.53178900  | -5.12266100 | 5.26053900 |
| C  | 0.87981800  | -4.56692600 | 3.99339600 |
| C  | 1.72613600  | -3.48169800 | 3.61187900 |
| C  | 2.52462200  | -2.52006400 | 4.28064700 |
| C  | -1.19925800 | -0.04383300 | 6.44642200 |
| C  | -1.93050700 | -1.09877900 | 7.06962500 |
| C  | -1.45764600 | -0.09668700 | 5.04342400 |
| C  | -2.34869900 | -1.18512900 | 4.80013100 |
| C  | -2.64072800 | -1.80434800 | 6.05270900 |
| H  | 1.72343600  | -3.30162400 | 2.53753600 |
| H  | 2.95785300  | -1.81667200 | 3.57050800 |
| Si | 4.05716600  | -0.77359300 | 5.81459300 |
| H  | 3.88808800  | 0.20678700  | 4.69449600 |
| H  | 2.85713200  | -2.25705300 | 7.74384400 |
| H  | 1.59271500  | -3.97685100 | 8.36176700 |
| H  | 0.33036400  | -5.49879100 | 7.30325900 |
| H  | -0.19110200 | -5.93414300 | 5.18771700 |
| H  | 1.02648100  | -6.61370400 | 2.07364400 |
| Si | 0.13744100  | -5.49767400 | 2.53159400 |
| H  | -0.06443000 | -4.57856200 | 1.36622400 |
| H  | -1.18097600 | -6.10160000 | 2.90786800 |
| C  | -3.62735600 | -2.91665900 | 6.27545400 |
| C  | -2.96631300 | -1.54380600 | 3.47717600 |
| C  | -0.97442500 | 0.89479300  | 4.02158300 |
| C  | -2.04061700 | -1.33975700 | 8.54942600 |
| C  | -0.40269000 | 1.01497400  | 7.15669900 |
| H  | 5.47873000  | -1.24686400 | 5.78372600 |

|   |             |             |            |
|---|-------------|-------------|------------|
| H | 3.84824900  | -0.06428000 | 7.11714300 |
| H | -3.16026300 | -2.61805200 | 3.38682300 |
| H | -3.92957400 | -1.03579800 | 3.33553600 |
| H | -2.33113800 | -1.25602400 | 2.63310000 |
| H | -3.70080300 | -3.58395600 | 5.41044100 |
| H | -3.36868900 | -3.53349600 | 7.14254400 |
| H | -4.63621000 | -2.52256000 | 6.45751700 |
| H | -2.23733800 | -2.39106400 | 8.78364000 |
| H | -1.13030400 | -1.05089500 | 9.08472500 |
| H | -2.86347400 | -0.75842400 | 8.98660000 |
| H | 0.40215300  | 1.41648000  | 6.53246200 |
| H | -1.03644600 | 1.86531900  | 7.44201800 |
| H | 0.05634600  | 0.63945200  | 8.07708300 |
| H | -0.88972200 | 0.45351000  | 3.02289500 |
| H | -1.66452400 | 1.74449500  | 3.93326200 |
| H | 0.00572800  | 1.31019600  | 4.27832800 |

$\Pi_{\text{linear}}$  (small core, singlet)

H= -1316.274891 au

|    |             |             |             |
|----|-------------|-------------|-------------|
| U  | -0.37316500 | -0.51431700 | -0.33263500 |
| C  | -2.68045000 | 0.76458500  | -0.15836300 |
| C  | -2.07585200 | 1.24918300  | -1.35295400 |
| C  | -1.55357200 | 0.66400200  | -2.52743100 |
| C  | -1.25252700 | -0.64422900 | -2.93699800 |
| C  | -1.35167700 | -1.92594700 | -2.35002800 |
| C  | -1.95393200 | -2.46149500 | -1.17675300 |
| C  | -2.66946400 | -1.86034000 | -0.10823000 |
| C  | -2.96328000 | -0.54671000 | 0.30775800  |
| C  | 1.65700900  | 1.25015300  | -0.46790700 |
| C  | 1.77250300  | 0.46158700  | -1.65511900 |
| C  | 1.96450400  | 0.42636100  | 0.65116300  |
| C  | 2.25820800  | -0.88584800 | 0.16236900  |
| C  | 2.13340100  | -0.86281800 | -1.25475100 |
| H  | -2.93559600 | -2.57160000 | 0.67138400  |
| H  | -3.38735100 | -0.55417200 | 1.31016400  |
| Si | -3.26659600 | 2.13460000  | 1.00903200  |
| H  | -3.28498700 | 1.64969400  | 2.42142000  |
| H  | -1.97212000 | 2.33333600  | -1.36930900 |
| H  | -1.17314400 | 1.40921100  | -3.22177800 |
| H  | -0.69473000 | -0.66464600 | -3.87051600 |
| H  | -0.82745200 | -2.67522600 | -2.94181300 |
| H  | -2.89972000 | -5.02235400 | -1.78042100 |
| Si | -1.79380500 | -4.34248600 | -1.03333900 |
| H  | -1.85719300 | -4.76940700 | 0.39584700  |
| H  | -0.50009900 | -4.79281700 | -1.63806700 |
| C  | 2.44482500  | -2.00107700 | -2.18409400 |
| C  | 2.73195400  | -2.03210600 | 1.00434500  |
| C  | 2.08936400  | 0.86206300  | 2.07956600  |
| C  | 1.80670200  | 0.99118600  | -3.05720100 |
| C  | 1.38092100  | 2.72630500  | -0.42282600 |
| H  | -4.64914900 | 2.58093100  | 0.64536700  |
| H  | -2.36414400 | 3.32398000  | 0.89651500  |
| H  | 2.67185600  | -2.98247700 | 0.46634100  |
| H  | 3.78259200  | -1.88944300 | 1.28897200  |
| H  | 2.14724100  | -2.12747700 | 1.92434300  |
| H  | 1.66198200  | 0.12580300  | 2.76699800  |
| H  | 3.14521200  | 0.99850100  | 2.34748300  |
| H  | 1.58673200  | 1.81716200  | 2.25659900  |
| H  | 0.87407400  | 3.02461200  | 0.49984800  |
| H  | 2.31652800  | 3.29863200  | -0.47213300 |

|   |             |             |             |
|---|-------------|-------------|-------------|
| H | 0.75837900  | 3.05237500  | -1.26078700 |
| H | 1.47966600  | 0.24869400  | -3.79013600 |
| H | 1.17779600  | 1.87702000  | -3.17893300 |
| H | 2.82968900  | 1.28367400  | -3.33002200 |
| H | 2.19681400  | -2.97246100 | -1.74558300 |
| H | 1.89976200  | -1.91638500 | -3.12830400 |
| H | 3.51506100  | -2.02360400 | -2.42779000 |
| N | -0.21904500 | -1.13167200 | 1.50715900  |
| O | -0.08979300 | -1.51541400 | 2.65613400  |

**H<sub>linear</sub>** (small core, triplet)

H= -1316.28944 au

|    |             |             |             |
|----|-------------|-------------|-------------|
| U  | -0.38028100 | -0.49516300 | -0.39404600 |
| C  | -2.72179900 | 0.75222800  | -0.12890600 |
| C  | -2.15427300 | 1.27172500  | -1.32553700 |
| C  | -1.62150200 | 0.71948000  | -2.51067800 |
| C  | -1.32459800 | -0.57867300 | -2.96351000 |
| C  | -1.43142700 | -1.87870400 | -2.42350600 |
| C  | -1.98839200 | -2.44706200 | -1.24400100 |
| C  | -2.66087900 | -1.87677100 | -0.12913900 |
| C  | -2.95948200 | -0.57366200 | 0.32469300  |
| C  | 1.68779400  | 1.24400000  | -0.48338100 |
| C  | 1.82489800  | 0.41816400  | -1.64278100 |
| C  | 1.96024500  | 0.44580400  | 0.66018600  |
| C  | 2.25672300  | -0.88672400 | 0.21039300  |
| C  | 2.16399100  | -0.90148900 | -1.20740500 |
| H  | -2.90767300 | -2.61269800 | 0.63414400  |
| H  | -3.36783700 | -0.60551900 | 1.33333300  |
| Si | -3.31161500 | 2.08702800  | 1.07390200  |
| H  | -3.28487300 | 1.58022600  | 2.47963000  |
| H  | -2.06779400 | 2.35754800  | -1.32086000 |
| H  | -1.25453200 | 1.48544400  | -3.19000600 |
| H  | -0.78581000 | -0.57082100 | -3.90815900 |
| H  | -0.92733000 | -2.61098700 | -3.05302900 |
| H  | -2.97411600 | -4.99023900 | -1.88005800 |
| Si | -1.83551400 | -4.33025000 | -1.16430900 |
| H  | -1.84323900 | -4.79982100 | 0.25444300  |
| H  | -0.56988800 | -4.77634600 | -1.82900100 |
| C  | 2.50128700  | -2.05806400 | -2.10529100 |
| C  | 2.75776100  | -2.00414300 | 1.07516600  |
| C  | 2.10033100  | 0.93954000  | 2.06857400  |
| C  | 1.85392000  | 0.90175100  | -3.06188700 |
| C  | 1.44212300  | 2.72629300  | -0.48855800 |
| H  | -4.71387300 | 2.50957100  | 0.75853900  |
| H  | -2.44208000 | 3.30128600  | 0.96498800  |
| H  | 2.63051600  | -2.97796400 | 0.59394900  |
| H  | 3.83021600  | -1.88083700 | 1.27558900  |
| H  | 2.24517000  | -2.04258500 | 2.04022600  |
| H  | 1.76987100  | 0.19839100  | 2.80130000  |
| H  | 3.14946400  | 1.17708700  | 2.28855600  |
| H  | 1.52069600  | 1.85147900  | 2.23771200  |
| H  | 0.94442800  | 3.06418200  | 0.42525300  |
| H  | 2.38662700  | 3.28127800  | -0.56284100 |
| H  | 0.81989500  | 3.03493300  | -1.33374900 |
| H  | 1.55640600  | 0.12336000  | -3.76945900 |
| H  | 1.19950500  | 1.76325100  | -3.21904700 |
| H  | 2.87037900  | 1.21495000  | -3.33613200 |
| H  | 2.30125400  | -3.02133100 | -1.62690500 |
| H  | 1.93062300  | -2.03176100 | -3.03851600 |
| H  | 3.56513700  | -2.04900400 | -2.37688800 |

|   |             |             |            |
|---|-------------|-------------|------------|
| N | -0.18379900 | -1.11239100 | 1.58588900 |
| O | -0.06272600 | -1.46886300 | 2.72571000 |

**$\Pi_{\text{linear}}$**  (small core, quintet)

H= -1316.291551 au

|    |             |             |             |
|----|-------------|-------------|-------------|
| U  | -0.36600800 | -0.62241700 | -0.35577100 |
| C  | -2.61540300 | 0.73956100  | 0.02593200  |
| C  | -2.02080100 | 1.31329600  | -1.13125000 |
| C  | -1.52514800 | 0.81665800  | -2.35353100 |
| C  | -1.29012100 | -0.45958200 | -2.89759100 |
| C  | -1.47648400 | -1.79075300 | -2.46604400 |
| C  | -2.09404600 | -2.41116300 | -1.34545600 |
| C  | -2.74178400 | -1.87986900 | -0.19981800 |
| C  | -2.94348400 | -0.60190000 | 0.36242100  |
| C  | 1.61682500  | 1.24841200  | -0.63567400 |
| C  | 1.83476100  | 0.34013900  | -1.71262100 |
| C  | 1.89439800  | 0.56411000  | 0.58294200  |
| C  | 2.29336500  | -0.76910000 | 0.25814300  |
| C  | 2.23161200  | -0.91286100 | -1.15674000 |
| H  | -3.04001600 | -2.65317700 | 0.50609600  |
| H  | -3.34402600 | -0.69237100 | 1.37080800  |
| Si | -3.11287200 | 2.00322700  | 1.34008500  |
| H  | -3.09576900 | 1.38449500  | 2.70098400  |
| H  | -1.86705300 | 2.38809400  | -1.04730200 |
| H  | -1.11234100 | 1.60767500  | -2.97563400 |
| H  | -0.73463600 | -0.40844900 | -3.83082300 |
| H  | -1.00531300 | -2.49946500 | -3.14611200 |
| H  | -3.24622000 | -4.82605500 | -2.17363800 |
| Si | -2.06948800 | -4.30033400 | -1.41023500 |
| H  | -2.11680000 | -4.87607000 | -0.03151200 |
| H  | -0.83271200 | -4.77855500 | -2.10611200 |
| C  | 2.65832400  | -2.12452300 | -1.93631700 |
| C  | 2.86069900  | -1.78331900 | 1.20737800  |
| C  | 1.89365800  | 1.17397700  | 1.95543300  |
| C  | 1.88197400  | 0.69816300  | -3.16766400 |
| C  | 1.30537400  | 2.71084300  | -0.76743900 |
| H  | -4.49342500 | 2.52715300  | 1.08725900  |
| H  | -2.17723300 | 3.17232300  | 1.31557800  |
| H  | 2.61806800  | -2.80849200 | 0.91121400  |
| H  | 3.95558200  | -1.70560700 | 1.23283300  |
| H  | 2.49627500  | -1.64580500 | 2.22708100  |
| H  | 1.69230800  | 0.43084600  | 2.73165300  |
| H  | 2.86533200  | 1.63197000  | 2.18349300  |
| H  | 1.14059900  | 1.96236900  | 2.05363100  |
| H  | 0.73729200  | 3.08952200  | 0.08761500  |
| H  | 2.22846400  | 3.30274300  | -0.82569300 |
| H  | 0.72581800  | 2.92591000  | -1.66955200 |
| H  | 1.66418100  | -0.15800900 | -3.81211500 |
| H  | 1.17884000  | 1.49534000  | -3.42311600 |
| H  | 2.88455000  | 1.05528300  | -3.43880700 |
| H  | 2.49215800  | -3.05132500 | -1.37866300 |
| H  | 2.12151000  | -2.21158900 | -2.88588300 |
| H  | 3.72935800  | -2.08426800 | -2.17561900 |
| N  | -0.18727800 | -1.58068900 | 1.66967500  |
| O  | 0.00106600  | -2.07923900 | 2.74106700  |

**$\Pi_{\text{linear}}$**  (5f-in-core)

H= -876.702267 au

|   |             |             |             |
|---|-------------|-------------|-------------|
| U | -0.39511200 | -0.54239100 | -0.32513700 |
| C | -2.75887600 | 0.77617700  | -0.19359300 |

|    |             |             |             |
|----|-------------|-------------|-------------|
| C  | -2.17220500 | 1.26015000  | -1.40905900 |
| C  | -1.66012700 | 0.65871400  | -2.57283400 |
| C  | -1.36931600 | -0.66235000 | -2.99246200 |
| C  | -1.47066000 | -1.94617500 | -2.42411700 |
| C  | -2.06230300 | -2.48257800 | -1.23373600 |
| C  | -2.76904400 | -1.86493800 | -0.16528600 |
| C  | -3.05216600 | -0.54056300 | 0.25843700  |
| C  | 1.70110600  | 1.25525600  | -0.42190200 |
| C  | 1.84655500  | 0.45917200  | -1.60079400 |
| C  | 1.99749000  | 0.42905900  | 0.70244600  |
| C  | 2.30922200  | -0.89325300 | 0.21275400  |
| C  | 2.19932800  | -0.87157000 | -1.20835700 |
| H  | -3.06300900 | -2.57636900 | 0.60449800  |
| H  | -3.49432800 | -0.55093000 | 1.25330400  |
| Si | -3.38050100 | 2.14164600  | 0.95110700  |
| H  | -3.40924700 | 1.66533000  | 2.36781200  |
| H  | -2.08750000 | 2.34507500  | -1.44179000 |
| H  | -1.28848300 | 1.39659100  | -3.28023400 |
| H  | -0.83200700 | -0.67754200 | -3.93821000 |
| H  | -0.98493000 | -2.70171100 | -3.03968800 |
| H  | -3.07658400 | -5.01118500 | -1.89343200 |
| Si | -1.96731900 | -4.36399900 | -1.12115500 |
| H  | -2.07138700 | -4.80928800 | 0.30183500  |
| H  | -0.67606500 | -4.85370400 | -1.70153200 |
| C  | 2.56155200  | -1.98848300 | -2.14528100 |
| C  | 2.88354000  | -2.01226000 | 1.02746500  |
| C  | 2.20118000  | 0.91179100  | 2.10625600  |
| C  | 1.83194300  | 0.97027800  | -3.00878700 |
| C  | 1.45255900  | 2.73626600  | -0.38713000 |
| H  | -4.76639700 | 2.57335700  | 0.57936200  |
| H  | -2.49552400 | 3.34552700  | 0.84951000  |
| H  | 2.72790200  | -2.98235700 | 0.54793900  |
| H  | 3.96667100  | -1.87669100 | 1.14513100  |
| H  | 2.44723500  | -2.06626000 | 2.02791800  |
| H  | 1.95296400  | 0.15063800  | 2.84981600  |
| H  | 3.25077300  | 1.19502500  | 2.25981500  |
| H  | 1.59127400  | 1.79305000  | 2.32222700  |
| H  | 0.94615000  | 3.04528800  | 0.53182900  |
| H  | 2.39590300  | 3.29516600  | -0.43924900 |
| H  | 0.83339500  | 3.06566700  | -1.22650000 |
| H  | 1.49983100  | 0.20888200  | -3.71904600 |
| H  | 1.18394200  | 1.84244900  | -3.12377900 |
| H  | 2.84373600  | 1.27460600  | -3.30729300 |
| H  | 2.42981300  | -2.96973000 | -1.68092200 |
| H  | 1.95283600  | -1.97297700 | -3.05456100 |
| H  | 3.61183200  | -1.91682900 | -2.45649800 |
| N  | -0.01518400 | -1.21740500 | 1.79235900  |
| O  | 0.19347300  | -1.57649900 | 2.91513300  |

## II (small core, singlet)

H= -1316.285647 au

|   |             |             |            |
|---|-------------|-------------|------------|
| O | 0.83786900  | -0.63940100 | 3.41674000 |
| U | 0.17596700  | -2.13275000 | 4.89675100 |
| C | 2.54200400  | -2.40396600 | 6.12052800 |
| C | 1.60455500  | -2.94469000 | 7.03855800 |
| C | 0.56458200  | -3.89074600 | 6.97091600 |
| C | -0.06183700 | -4.62806000 | 5.94978000 |
| C | 0.12705200  | -4.78131500 | 4.56033800 |
| C | 1.08851800  | -4.33050000 | 3.62297800 |
| C | 2.21622600  | -3.48176800 | 3.74631800 |



|    |             |             |            |
|----|-------------|-------------|------------|
| C  | 2.79464400  | -2.68132100 | 4.75128500 |
| C  | -1.04956300 | 0.01064000  | 5.99679500 |
| C  | -1.28893500 | -1.00894200 | 6.96606100 |
| C  | -1.81006500 | -0.29762200 | 4.83119800 |
| C  | -2.47299600 | -1.53698400 | 5.06037800 |
| C  | -2.16936500 | -1.96553300 | 6.38659500 |
| H  | 2.67085800  | -3.25839900 | 2.78341100 |
| H  | 3.55795300  | -2.03240400 | 4.32596800 |
| Si | 3.71405100  | -1.12902300 | 6.88073400 |
| H  | 4.22038800  | -0.18958100 | 5.83499500 |
| H  | 1.65049800  | -2.48048700 | 8.02255200 |
| H  | 0.03954700  | -3.98287300 | 7.91865200 |
| H  | -0.95893700 | -5.13244400 | 6.30030600 |
| H  | -0.68264900 | -5.35527100 | 4.11023200 |
| H  | 1.24432200  | -6.32644900 | 1.68194000 |
| Si | 0.75173700  | -4.92123300 | 1.85392500 |
| H  | 1.45422800  | -4.05137400 | 0.86608900 |
| H  | -0.71892100 | -4.92871900 | 1.58025100 |
| C  | -2.84189200 | -3.09476200 | 7.10804000 |
| C  | -3.40751900 | -2.21932200 | 4.10391700 |
| C  | -1.98926400 | 0.59790100  | 3.64400400 |
| C  | -0.85570900 | -0.96178000 | 8.40064400 |
| C  | -0.23805100 | 1.25636900  | 6.20603200 |
| H  | 4.89131100  | -1.80187400 | 7.51665000 |
| H  | 3.01027400  | -0.35181600 | 7.94981800 |
| H  | -3.44765300 | -3.30003500 | 4.27174700 |
| H  | -4.43190700 | -1.83962100 | 4.21254000 |
| H  | -3.10960400 | -2.05747500 | 3.06380600 |
| H  | -3.08935000 | -3.92507500 | 6.44049000 |
| H  | -2.22855900 | -3.49049900 | 7.92159400 |
| H  | -3.78483200 | -2.75172900 | 7.55406800 |
| H  | -0.77301100 | -1.95882400 | 8.84163800 |
| H  | 0.10895400  | -0.46121800 | 8.52373200 |
| H  | -1.58491800 | -0.40290800 | 9.00225500 |
| H  | 0.21985500  | 1.60038400  | 5.27436100 |
| H  | -0.86375300 | 2.07537500  | 6.58469400 |
| H  | 0.56501700  | 1.10574700  | 6.93430700 |
| H  | -2.26943600 | 0.03599500  | 2.75034300 |
| H  | -2.77816000 | 1.33495500  | 3.84248100 |
| H  | -1.07296800 | 1.14329400  | 3.40518100 |
| N  | 0.01286600  | -1.48149400 | 2.85010300 |

**H** (small core, triplet)

H= -1316.287162 au

|   |             |             |            |
|---|-------------|-------------|------------|
| O | 0.78967300  | -0.66474900 | 3.35297200 |
| U | 0.16598100  | -2.14181800 | 4.90709000 |
| C | 2.53117500  | -2.40599500 | 6.13223300 |
| C | 1.60494100  | -2.96679900 | 7.04981400 |
| C | 0.56551600  | -3.91103000 | 6.97358600 |
| C | -0.06263000 | -4.63546300 | 5.94381600 |
| C | 0.13362100  | -4.78580100 | 4.55453000 |
| C | 1.09672100  | -4.33042000 | 3.62139600 |
| C | 2.21836400  | -3.47273900 | 3.74963300 |
| C | 2.78570400  | -2.67037900 | 4.75891300 |
| C | -1.04376600 | 0.01890800  | 5.98627600 |
| C | -1.28256000 | -0.99981900 | 6.95837000 |
| C | -1.81358100 | -0.28582000 | 4.82647100 |
| C | -2.48249700 | -1.52089800 | 5.06109900 |
| C | -2.17153100 | -1.95141900 | 6.38542000 |
| H | 2.67699300  | -3.24708500 | 2.78897900 |

|    |             |             |            |
|----|-------------|-------------|------------|
| H  | 3.54583600  | -2.01358100 | 4.33936700 |
| Si | 3.69950200  | -1.13482500 | 6.90227500 |
| H  | 4.19160700  | -0.17603400 | 5.86666200 |
| H  | 1.65488200  | -2.51500400 | 8.03937100 |
| H  | 0.04087000  | -4.01339500 | 7.92066900 |
| H  | -0.96074500 | -5.14244200 | 6.28832000 |
| H  | -0.67314500 | -5.36044500 | 4.09979700 |
| H  | 1.29021600  | -6.33311800 | 1.68954000 |
| Si | 0.77847800  | -4.93381300 | 1.85368500 |
| H  | 1.47575100  | -4.06005000 | 0.86496300 |
| H  | -0.69011800 | -4.96084200 | 1.57001600 |
| C  | -2.84585000 | -3.07975500 | 7.10689500 |
| C  | -3.43403200 | -2.20313600 | 4.12185700 |
| C  | -1.98762600 | 0.60635900  | 3.63567000 |
| C  | -0.84084800 | -0.95207900 | 8.39030200 |
| C  | -0.22349400 | 1.25939600  | 6.19459400 |
| H  | 4.88798700  | -1.80508800 | 7.52007600 |
| H  | 2.99916400  | -0.37624900 | 7.98702300 |
| H  | -3.38571600 | -3.29363400 | 4.20962300 |
| H  | -4.47192800 | -1.91221100 | 4.33069000 |
| H  | -3.22619300 | -1.94791000 | 3.07939900 |
| H  | -3.08901400 | -3.91126300 | 6.43903000 |
| H  | -2.23439500 | -3.47358200 | 7.92272200 |
| H  | -3.79124500 | -2.73815600 | 7.54900400 |
| H  | -0.76383400 | -1.94880400 | 8.83287000 |
| H  | 0.12853100  | -0.45901000 | 8.50668800 |
| H  | -1.56242800 | -0.38557200 | 8.99403900 |
| H  | 0.18962500  | 1.63320000  | 5.25365900 |
| H  | -0.82923400 | 2.06574600  | 6.62888800 |
| H  | 0.61455300  | 1.08794200  | 6.87794500 |
| H  | -2.27155100 | 0.04405900  | 2.74289600 |
| H  | -2.77156500 | 1.34958600  | 3.82944900 |
| H  | -1.06861500 | 1.14661900  | 3.39442000 |
| N  | -0.00413000 | -1.54121000 | 2.84371500 |

## II (small core, quintet)

H= -1316.282725 au

|    |             |             |            |
|----|-------------|-------------|------------|
| O  | 0.51086000  | -0.95407600 | 2.84125400 |
| U  | 0.11552500  | -2.22811000 | 4.89841500 |
| C  | 2.48691500  | -2.33081000 | 6.11861900 |
| C  | 1.58851900  | -2.92742900 | 7.04196800 |
| C  | 0.57727300  | -3.90333700 | 6.97652700 |
| C  | -0.02090600 | -4.67404900 | 5.95947100 |
| C  | 0.21028300  | -4.86307600 | 4.58080500 |
| C  | 1.16341400  | -4.38109200 | 3.64732200 |
| C  | 2.22405600  | -3.44782200 | 3.75253500 |
| C  | 2.74288700  | -2.58725600 | 4.74413600 |
| C  | -0.97309900 | -0.01654300 | 6.03918300 |
| C  | -1.27468500 | -1.03763300 | 6.98836000 |
| C  | -1.75033500 | -0.25760500 | 4.86829300 |
| C  | -2.49379800 | -1.45513900 | 5.07667900 |
| C  | -2.20545300 | -1.93330000 | 6.38875200 |
| H  | 2.66460300  | -3.21160800 | 2.78593500 |
| H  | 3.46008200  | -1.89215100 | 4.30948100 |
| Si | 3.61259900  | -1.00744600 | 6.86080200 |
| H  | 3.91265900  | 0.05379800  | 5.85042600 |
| H  | 1.62096600  | -2.46310000 | 8.02569400 |
| H  | 0.04517800  | -3.99659400 | 7.92038800 |
| H  | -0.90678100 | -5.20081100 | 6.30659900 |
| H  | -0.56013500 | -5.48778300 | 4.13002200 |

|    |             |             |            |
|----|-------------|-------------|------------|
| H  | 1.58989200  | -6.37045600 | 1.73804700 |
| Si | 0.90080000  | -5.04800800 | 1.89403500 |
| H  | 1.46726900  | -4.10888400 | 0.88107100 |
| H  | -0.55512300 | -5.27007400 | 1.63319800 |
| C  | -2.90841200 | -3.06376100 | 7.08024300 |
| C  | -3.49242600 | -2.04478800 | 4.12297400 |
| C  | -1.89140600 | 0.67995000  | 3.70664300 |
| C  | -0.85633100 | -1.03670800 | 8.42784600 |
| C  | -0.10273600 | 1.18497400  | 6.27617500 |
| H  | 4.91439300  | -1.59828700 | 7.30654500 |
| H  | 2.96233300  | -0.38295000 | 8.05592700 |
| H  | -3.60117800 | -3.12554800 | 4.25871000 |
| H  | -4.48609800 | -1.60247200 | 4.27270000 |
| H  | -3.20795100 | -1.87014600 | 3.08178000 |
| H  | -3.19175400 | -3.86037600 | 6.38600700 |
| H  | -2.29284100 | -3.51076300 | 7.86541400 |
| H  | -3.83246300 | -2.71068400 | 7.55692200 |
| H  | -0.78862600 | -2.04569500 | 8.84383800 |
| H  | 0.11118500  | -0.54912900 | 8.57530900 |
| H  | -1.58801300 | -0.48785800 | 9.03561300 |
| H  | 0.39621100  | 1.51740900  | 5.36009900 |
| H  | -0.69398700 | 2.03477200  | 6.64234800 |
| H  | 0.67306400  | 0.98942400  | 7.02242900 |
| H  | -2.20204500 | 0.15692900  | 2.79932600 |
| H  | -2.64725000 | 1.44445400  | 3.92863100 |
| H  | -0.95559600 | 1.19582200  | 3.47657600 |
| N  | -0.38811600 | -1.76380500 | 2.53664500 |

## II (5f-in-core)

H= -876.710480 au

|    |             |             |            |
|----|-------------|-------------|------------|
| O  | 0.11517100  | -1.14482200 | 2.74175500 |
| U  | 0.08691700  | -2.22562500 | 4.93325500 |
| C  | 2.71305300  | -1.92562500 | 5.61768800 |
| C  | 2.13692300  | -2.37006000 | 6.84327100 |
| C  | 1.25976300  | -3.40902200 | 7.20884200 |
| C  | 0.53283700  | -4.42555500 | 6.54577600 |
| C  | 0.42889200  | -4.87982400 | 5.20902700 |
| C  | 1.12927400  | -4.58921200 | 3.99847700 |
| C  | 2.10909700  | -3.60835800 | 3.67725900 |
| C  | 2.73054800  | -2.51007200 | 4.31346300 |
| C  | -1.09687700 | -0.22470300 | 6.44097500 |
| C  | -1.63159200 | -1.43602800 | 6.98260100 |
| C  | -1.61673600 | -0.07031400 | 5.12176400 |
| C  | -2.46998200 | -1.18754600 | 4.84582500 |
| C  | -2.47300300 | -2.03304900 | 5.99466600 |
| H  | 2.35106600  | -3.60723600 | 2.61569800 |
| H  | 3.28877500  | -1.91540900 | 3.59216400 |
| Si | 3.83408200  | -0.41550100 | 5.78410900 |
| H  | 3.82233300  | 0.38736300  | 4.52190500 |
| H  | 2.34685500  | -1.70973600 | 7.68282300 |
| H  | 0.98027000  | -3.34491400 | 8.25743000 |
| H  | -0.17191600 | -4.92545800 | 7.20637000 |
| H  | -0.33222900 | -5.65057800 | 5.09990900 |
| H  | 1.41077600  | -7.01237500 | 2.63340700 |
| Si | 0.65397800  | -5.72039900 | 2.56216400 |
| H  | 0.96953500  | -5.07199400 | 1.25374600 |
| H  | -0.80326700 | -6.05735800 | 2.62304900 |
| C  | -3.32513700 | -3.25343500 | 6.19626200 |
| C  | -3.35061500 | -1.33611500 | 3.63963300 |
| C  | -1.43373100 | 1.12467000  | 4.23305800 |

|   |             |             |            |
|---|-------------|-------------|------------|
| C | -1.52259500 | -1.87536100 | 8.41190300 |
| C | -0.27084100 | 0.77736800  | 7.19495900 |
| H | 5.25040100  | -0.81868000 | 6.05771600 |
| H | 3.37664100  | 0.44546300  | 6.91978200 |
| H | -3.60771400 | -2.38081300 | 3.44568600 |
| H | -4.29097300 | -0.78801200 | 3.78196700 |
| H | -2.88342700 | -0.94628000 | 2.73063300 |
| H | -3.58702400 | -3.72924200 | 5.24710300 |
| H | -2.82585400 | -4.00641300 | 6.81431100 |
| H | -4.26670400 | -2.99585400 | 6.69841800 |
| H | -1.58451800 | -2.96202500 | 8.51541100 |
| H | -0.58801300 | -1.54647400 | 8.87341900 |
| H | -2.34342200 | -1.44705700 | 9.00222700 |
| H | 0.30124200  | 1.42370700  | 6.52376800 |
| H | -0.90957100 | 1.43039400  | 7.80373500 |
| H | 0.44151400  | 0.29761300  | 7.87283100 |
| H | -1.42434600 | 0.85336000  | 3.17383600 |
| H | -2.25078900 | 1.84306700  | 4.37844300 |
| H | -0.49884200 | 1.65252600  | 4.44261600 |
| N | -0.62680400 | -2.12862500 | 2.61158500 |

### III<sub>linear</sub> (large core)

H= -1623.608333 au

|    |             |             |             |
|----|-------------|-------------|-------------|
| U  | -0.34079100 | -0.52469300 | -0.18386900 |
| C  | -2.69835100 | 0.82403500  | -0.41055300 |
| C  | -2.03912500 | 1.14491300  | -1.64000100 |
| C  | -1.46174000 | 0.39700700  | -2.67915900 |
| C  | -1.12017900 | -0.95622200 | -2.89763300 |
| C  | -1.25716100 | -2.15779900 | -2.17506700 |
| C  | -1.99346600 | -2.54546500 | -1.01011500 |
| C  | -2.78399900 | -1.79480800 | -0.10034900 |
| C  | -3.06136900 | -0.42932600 | 0.15774900  |
| C  | 1.65745800  | 1.42367800  | -0.38368800 |
| C  | 1.78573700  | 0.69243800  | -1.60428600 |
| C  | 2.05836800  | 0.56756400  | 0.68230100  |
| C  | 2.41293500  | -0.70264500 | 0.12264800  |
| C  | 2.23597800  | -0.62759500 | -1.28799000 |
| O  | 0.17170700  | -1.62091900 | 3.10952600  |
| H  | -3.17249400 | -2.41151800 | 0.70811200  |
| H  | -3.59396600 | -0.32109900 | 1.10057600  |
| Si | -3.40366600 | 2.32648600  | 0.47920800  |
| H  | -3.64188900 | 2.02154800  | 1.92413600  |
| H  | -1.94099300 | 2.21646300  | -1.80916100 |
| H  | -1.05113700 | 1.04004700  | -3.45327700 |
| H  | -0.50120000 | -1.08186600 | -3.78375200 |
| H  | -0.71534700 | -2.98004800 | -2.64038600 |
| H  | -2.98984500 | -5.11228200 | -1.53158200 |
| Si | -1.97430700 | -4.40052400 | -0.68781400 |
| H  | -2.29240400 | -4.69260800 | 0.74420300  |
| H  | -0.63756500 | -4.98532400 | -1.02690300 |
| C  | 2.62582700  | -1.67663400 | -2.28868500 |
| C  | 3.01385000  | -1.85055400 | 0.87643200  |
| C  | 2.25203700  | 0.97973700  | 2.11009800  |
| C  | 1.71800400  | 1.27686200  | -2.98165000 |
| C  | 1.32942500  | 2.88469000  | -0.26723500 |
| H  | -4.71128100 | 2.75444000  | -0.11641400 |
| H  | -2.46821600 | 3.49167100  | 0.37438400  |
| U  | 0.26146700  | -2.28738200 | 5.25573300  |
| C  | 2.89967700  | -2.05960200 | 5.85804000  |
| C  | 2.22735900  | -2.22417400 | 7.11055600  |

|    |             |             |             |
|----|-------------|-------------|-------------|
| C  | 1.35922700  | -3.19383800 | 7.65685300  |
| C  | 0.60432200  | -4.27656900 | 7.16114000  |
| C  | 0.42599400  | -4.88853300 | 5.89953900  |
| C  | 1.11558300  | -4.81583200 | 4.64831500  |
| C  | 2.18418200  | -3.99414200 | 4.21134900  |
| C  | 2.89895800  | -2.86778300 | 4.69007500  |
| C  | -1.09977400 | -0.30911200 | 6.65029800  |
| C  | -1.56340600 | -1.51276000 | 7.26830400  |
| C  | -1.59603600 | -0.28447800 | 5.31400700  |
| C  | -2.34987600 | -1.48130600 | 5.09875000  |
| C  | -2.32891200 | -2.23959800 | 6.30626900  |
| H  | 2.42890200  | -4.16627200 | 3.16503100  |
| H  | 3.52672600  | -2.45689500 | 3.90257100  |
| Si | 4.12884500  | -0.62592700 | 5.84501700  |
| H  | 4.46812000  | -0.24287600 | 4.44213800  |
| H  | 2.43764000  | -1.42732900 | 7.82247400  |
| H  | 1.08266600  | -2.95043100 | 8.67896800  |
| H  | -0.10518700 | -4.64807100 | 7.89715000  |
| H  | -0.38670100 | -5.61277800 | 5.90933700  |
| H  | 1.24269400  | -7.41576300 | 3.63670200  |
| Si | 0.55010300  | -6.10986500 | 3.39260000  |
| H  | 0.86617300  | -5.66426600 | 2.00338400  |
| H  | -0.92062300 | -6.35081300 | 3.52901000  |
| C  | -3.11130400 | -3.49054100 | 6.58264900  |
| C  | -3.13265800 | -1.80220400 | 3.86044000  |
| C  | -1.46119400 | 0.84671800  | 4.33938400  |
| C  | -1.48601800 | -1.82694700 | 8.73101400  |
| C  | -0.37384900 | 0.80884400  | 7.34239600  |
| H  | 5.39414600  | -1.00709700 | 6.54944500  |
| H  | 3.55653700  | 0.55747700  | 6.56172000  |
| H  | 2.89022300  | -2.79669200 | 0.34148100  |
| H  | 4.09215000  | -1.70068600 | 1.02220500  |
| H  | 2.55222700  | -1.96581000 | 1.85969600  |
| H  | 2.07037200  | 0.15057500  | 2.79744500  |
| H  | 3.27864900  | 1.33327000  | 2.27422300  |
| H  | 1.58111900  | 1.79598800  | 2.39357400  |
| H  | 0.87046700  | 3.12503000  | 0.69633700  |
| H  | 2.23334600  | 3.50157700  | -0.35650100 |
| H  | 0.63596500  | 3.21136400  | -1.04762700 |
| H  | 1.38718700  | 0.54786600  | -3.72634400 |
| H  | 1.04596500  | 2.13734500  | -3.03248500 |
| H  | 2.71265200  | 1.62596800  | -3.29082100 |
| H  | 2.57092800  | -2.68451900 | -1.86736500 |
| H  | 1.98330900  | -1.65601600 | -3.17396800 |
| H  | 3.65753200  | -1.52683800 | -2.63329400 |
| H  | -3.33362600 | -2.87363200 | 3.76795000  |
| H  | -4.10498800 | -1.29272300 | 3.87366400  |
| H  | -2.60378600 | -1.48383000 | 2.95848000  |
| H  | -3.30283000 | -4.06549800 | 5.67239200  |
| H  | -2.59407200 | -4.14965300 | 7.28612900  |
| H  | -4.08732500 | -3.24917100 | 7.02301200  |
| H  | -1.46262200 | -2.90284000 | 8.92465100  |
| H  | -0.60660800 | -1.38133600 | 9.20334100  |
| H  | -2.36707000 | -1.42673100 | 9.24999300  |
| H  | 0.26415300  | 1.37213400  | 6.65532200  |
| H  | -1.08258900 | 1.52292000  | 7.78131200  |
| H  | 0.26180500  | 0.44472800  | 8.15444800  |
| H  | -1.27555400 | 0.48853900  | 3.32184500  |
| H  | -2.37798800 | 1.44930500  | 4.32145300  |
| H  | -0.64158900 | 1.51858200  | 4.61046500  |

|                         |             |             |             |
|-------------------------|-------------|-------------|-------------|
| N                       | -0.08344600 | -1.19368800 | 1.91728400  |
| <b>III (large core)</b> |             |             |             |
| H= -1623.620838 au      |             |             |             |
| U                       | -0.17205500 | -0.81444400 | 0.24311400  |
| C                       | -2.36964600 | 0.52567000  | -0.60284900 |
| C                       | -1.64769600 | 0.33940500  | -1.81525400 |
| C                       | -0.98038900 | -0.73204100 | -2.44144400 |
| C                       | -0.69300200 | -2.07773800 | -2.14004600 |
| C                       | -1.15055600 | -2.99051700 | -1.15660600 |
| C                       | -2.11657900 | -2.91682100 | -0.12805700 |
| C                       | -2.81299100 | -1.82951000 | 0.46551600  |
| C                       | -2.88167900 | -0.42929000 | 0.33217900  |
| C                       | 1.59640500  | 1.35532400  | 0.22390100  |
| C                       | 1.63919700  | 0.91581000  | -1.13363300 |
| C                       | 2.24485800  | 0.36711000  | 1.02450600  |
| C                       | 2.62863500  | -0.70970400 | 0.17411800  |
| C                       | 2.24901600  | -0.37203200 | -1.16136200 |
| O                       | 0.03762000  | -0.78259800 | 2.69190300  |
| H                       | -3.36902400 | -2.14257700 | 1.34804100  |
| H                       | -3.46178300 | 0.02395700  | 1.13377400  |
| Si                      | -3.00202500 | 2.28089200  | -0.34012300 |
| H                       | -3.15950100 | 2.57766200  | 1.11776300  |
| H                       | -1.45542300 | 1.27387600  | -2.33813900 |
| H                       | -0.42490600 | -0.39450000 | -3.31307800 |
| H                       | 0.03190400  | -2.51870300 | -2.81871900 |
| H                       | -0.69437700 | -3.97183400 | -1.26601500 |
| H                       | -3.97916800 | -4.79775900 | 0.68519600  |
| Si                      | -2.50052700 | -4.55466300 | 0.72476700  |
| H                       | -2.10432000 | -4.58124500 | 2.16962100  |
| H                       | -1.81468700 | -5.67908200 | 0.01860600  |
| C                       | 2.65297300  | -1.13590500 | -2.38730500 |
| C                       | 3.48644700  | -1.88437800 | 0.54540000  |
| C                       | 2.63852600  | 0.55465700  | 2.45590600  |
| C                       | 1.34032600  | 1.77506200  | -2.32401900 |
| C                       | 1.16576500  | 2.71795700  | 0.68767800  |
| H                       | -4.33757800 | 2.47877500  | -0.98964700 |
| H                       | -2.05566900 | 3.27221000  | -0.94302800 |
| U                       | 0.05630000  | -2.19206400 | 4.70838500  |
| C                       | 2.45355700  | -2.25478800 | 5.97164400  |
| C                       | 1.59654500  | -2.85967300 | 6.93265300  |
| C                       | 0.59112400  | -3.84688000 | 6.91205800  |
| C                       | -0.04281600 | -4.64552600 | 5.93977200  |
| C                       | 0.22874800  | -4.95275400 | 4.58221900  |
| C                       | 1.27232500  | -4.61411600 | 3.69321200  |
| C                       | 2.30688200  | -3.64072400 | 3.74733300  |
| C                       | 2.75977200  | -2.63861400 | 4.62655200  |
| C                       | -0.96062300 | 0.00998300  | 6.11468000  |
| C                       | -1.28870200 | -1.07840100 | 6.97908000  |
| C                       | -1.78342100 | -0.09115100 | 4.95282300  |
| C                       | -2.56448400 | -1.27763500 | 5.06557100  |
| C                       | -2.25336200 | -1.89183000 | 6.31848800  |
| H                       | 2.83708900  | -3.56494100 | 2.79932500  |
| H                       | 3.52480100  | -2.01573500 | 4.16660000  |
| Si                      | 3.59676400  | -0.92411700 | 6.65955200  |
| H                       | 3.88452900  | 0.11756400  | 5.62488300  |
| H                       | 1.63280400  | -2.36388700 | 7.89999200  |
| H                       | 0.07609900  | -3.90351500 | 7.86789300  |
| H                       | -0.92605900 | -5.15332100 | 6.31747600  |
| H                       | -0.50094600 | -5.64477900 | 4.16726100  |

|    |             |             |             |
|----|-------------|-------------|-------------|
| H  | 2.59292000  | -6.12155300 | 1.78456700  |
| Si | 1.24146900  | -5.52720100 | 2.04342600  |
| H  | 0.93484300  | -4.64097100 | 0.87496500  |
| H  | 0.23385300  | -6.63027300 | 2.08264600  |
| C  | -3.00560200 | -3.03951700 | 6.92342200  |
| C  | -3.68920900 | -1.70209300 | 4.16683600  |
| C  | -1.93578800 | 0.98580900  | 3.92470100  |
| C  | -0.89301200 | -1.17944600 | 8.42027900  |
| C  | -0.09164300 | 1.18117300  | 6.47632400  |
| H  | 4.90816900  | -1.50753400 | 7.08900700  |
| H  | 2.97687800  | -0.27074200 | 7.85491800  |
| H  | 3.08170900  | -2.83964500 | 0.19324500  |
| H  | 4.48975100  | -1.78283200 | 0.11234400  |
| H  | 3.60867300  | -1.95588800 | 1.62762400  |
| H  | 2.68302300  | -0.38931500 | 3.00073800  |
| H  | 3.62923400  | 1.02402900  | 2.51826100  |
| H  | 1.93730300  | 1.20157000  | 2.98888200  |
| H  | 0.82563700  | 2.70951800  | 1.72729900  |
| H  | 1.99506800  | 3.43536300  | 0.62799200  |
| H  | 0.34920900  | 3.11877700  | 0.08031900  |
| H  | 1.07005400  | 1.18860000  | -3.20547000 |
| H  | 0.53193200  | 2.48502300  | -2.13091100 |
| H  | 2.22829200  | 2.36373500  | -2.59074800 |
| H  | 2.65227600  | -2.21639100 | -2.21585000 |
| H  | 1.99285600  | -0.93442500 | -3.23545200 |
| H  | 3.66966300  | -0.85908100 | -2.69699700 |
| H  | -3.64065500 | -2.76214300 | 3.89434200  |
| H  | -4.65829900 | -1.54122600 | 4.65625700  |
| H  | -3.69526500 | -1.12255600 | 3.24210600  |
| H  | -3.34954000 | -3.74911700 | 6.16530300  |
| H  | -2.40082200 | -3.59340200 | 7.64648600  |
| H  | -3.89627700 | -2.67974300 | 7.45577600  |
| H  | -0.92773000 | -2.20617600 | 8.79275500  |
| H  | 0.10992800  | -0.78648000 | 8.60690600  |
| H  | -1.58700300 | -0.59263400 | 9.03705000  |
| H  | 0.34698800  | 1.65614600  | 5.59366700  |
| H  | -0.66903900 | 1.95387000  | 7.00137500  |
| H  | 0.73171600  | 0.89082400  | 7.13527100  |
| H  | -2.28584800 | 0.59719900  | 2.96760000  |
| H  | -2.66255700 | 1.73452600  | 4.26659900  |
| H  | -0.99375400 | 1.50759300  | 3.73679200  |
| N  | -0.14584300 | -2.09445900 | 2.29799100  |

**TS<sub>III-IV</sub> (large core)**

H= -1736.858509 au

|   |             |             |             |
|---|-------------|-------------|-------------|
| U | -0.03270700 | -0.79685500 | 0.07451600  |
| C | -2.39726700 | 0.51827900  | -0.60626200 |
| C | -1.60615700 | 0.57164600  | -1.77850900 |
| C | -0.82505100 | -0.33344200 | -2.53568500 |
| C | -0.47376000 | -1.69409300 | -2.45854600 |
| C | -0.90233400 | -2.77864700 | -1.65190400 |
| C | -1.83592400 | -2.91922700 | -0.59941800 |
| C | -2.59776800 | -1.98664000 | 0.15754200  |
| C | -2.78592200 | -0.59218500 | 0.20570500  |
| C | 1.36265900  | 1.58336800  | 0.49094000  |
| C | 1.52713200  | 1.35370100  | -0.90892100 |
| C | 2.11495100  | 0.59108900  | 1.18499800  |
| C | 2.71689400  | -0.27034000 | 0.21764500  |
| C | 2.34154800  | 0.19239200  | -1.07624000 |
| O | 0.10213600  | -1.26454400 | 2.52417100  |

|    |             |             |             |
|----|-------------|-------------|-------------|
| H  | -3.08777700 | -2.46420800 | 1.00283900  |
| H  | -3.39798500 | -0.30176000 | 1.05796300  |
| Si | -3.24364800 | 2.13975800  | -0.16206300 |
| H  | -3.41778600 | 2.27294000  | 1.31797400  |
| H  | -1.48284000 | 1.58472800  | -2.15464400 |
| H  | -0.26449600 | 0.18030600  | -3.31217600 |
| H  | 0.28794600  | -1.97889900 | -3.18002900 |
| H  | -0.38402900 | -3.70118600 | -1.90689500 |
| H  | -3.28917400 | -5.26911200 | -0.89224800 |
| Si | -2.14740900 | -4.71424800 | -0.09419000 |
| H  | -2.52046900 | -4.80913100 | 1.34909700  |
| H  | -0.94869000 | -5.56027700 | -0.37607000 |
| C  | 2.88631300  | -0.30792500 | -2.38150900 |
| C  | 3.73975400  | -1.33163400 | 0.49488700  |
| C  | 2.40060100  | 0.59582900  | 2.65290500  |
| C  | 1.18360300  | 2.34104200  | -1.98136500 |
| C  | 0.70629900  | 2.79167000  | 1.09445700  |
| H  | -4.60494300 | 2.23261000  | -0.78118200 |
| H  | -2.44103800 | 3.30025700  | -0.66557000 |
| U  | 0.12160100  | -2.36479200 | 4.78567500  |
| C  | 2.87444600  | -2.45628200 | 5.19248000  |
| C  | 2.29703900  | -2.24721600 | 6.48476400  |
| C  | 1.35935100  | -2.93588000 | 7.27252600  |
| C  | 0.43006100  | -3.97739200 | 7.06424700  |
| C  | 0.05675500  | -4.80447800 | 5.99025600  |
| C  | 0.60673900  | -5.07195300 | 4.69809800  |
| C  | 1.72072000  | -4.52372100 | 4.02281500  |
| C  | 2.62712300  | -3.44915300 | 4.21018200  |
| C  | -1.02503700 | -0.12087100 | 6.04632300  |
| C  | -1.44597000 | -1.19344100 | 6.88818700  |
| C  | -1.70408700 | -0.25455900 | 4.79966600  |
| C  | -2.49821800 | -1.44038800 | 4.85047800  |
| C  | -2.33307500 | -2.02361600 | 6.14224800  |
| H  | 1.83260000  | -4.92899600 | 3.02154000  |
| H  | 3.24415800  | -3.31888800 | 3.32265200  |
| Si | 4.44636300  | -1.44441000 | 4.96036700  |
| H  | 4.88119200  | -1.42761400 | 3.53112000  |
| H  | 2.69714400  | -1.37441100 | 6.99995600  |
| H  | 1.21027000  | -2.45415200 | 8.23461300  |
| H  | -0.24430900 | -4.08784700 | 7.91012200  |
| H  | -0.83197600 | -5.39123100 | 6.21710300  |
| H  | 0.22632500  | -7.81333700 | 4.35548400  |
| Si | -0.24720800 | -6.50066200 | 3.80697800  |
| H  | 0.04513100  | -6.46989400 | 2.34543800  |
| H  | -1.72711500 | -6.44291800 | 4.03157300  |
| C  | -3.12909500 | -3.17007600 | 6.69205300  |
| C  | -3.51091600 | -1.87455100 | 3.83444900  |
| C  | -1.75147000 | 0.79623200  | 3.73623800  |
| C  | -1.22808700 | -1.26623900 | 8.36825000  |
| C  | -0.18528700 | 1.04742200  | 6.47900100  |
| H  | 5.55725900  | -2.04204900 | 5.76858200  |
| H  | 4.25832800  | -0.03790000 | 5.43987400  |
| H  | 3.69977300  | -2.14688100 | -0.23272200 |
| H  | 4.75119700  | -0.90682700 | 0.45480800  |
| H  | 3.61321300  | -1.76963400 | 1.48697400  |
| H  | 2.54013600  | -0.41408800 | 3.04435400  |
| H  | 3.31563500  | 1.16388300  | 2.86261400  |
| H  | 1.59123300  | 1.05836600  | 3.22376400  |
| H  | 0.41739500  | 2.62420600  | 2.13500700  |
| H  | 1.38745000  | 3.65270700  | 1.08360000  |



|   |             |             |             |
|---|-------------|-------------|-------------|
| H | -0.19508000 | 3.08584700  | 0.54818800  |
| H | 1.02228200  | 1.86952200  | -2.95371600 |
| H | 0.29568500  | 2.92890200  | -1.73610400 |
| H | 2.01350800  | 3.04988600  | -2.10494600 |
| H | 3.16269900  | -1.36475500 | -2.33180100 |
| H | 2.16687200  | -0.19231500 | -3.19753000 |
| H | 3.78899300  | 0.24916300  | -2.66479100 |
| H | -3.60087600 | -2.96331500 | 3.77310400  |
| H | -4.50534500 | -1.48025600 | 4.08213100  |
| H | -3.25122800 | -1.51151900 | 2.84012700  |
| H | -3.44144300 | -3.86574600 | 5.90819300  |
| H | -2.56693200 | -3.74206500 | 7.43588300  |
| H | -4.04120700 | -2.80779200 | 7.18448900  |
| H | -1.21289300 | -2.29358600 | 8.74196000  |
| H | -0.30000500 | -0.77829300 | 8.67647700  |
| H | -2.04776500 | -0.75076300 | 8.88676900  |
| H | 0.30530000  | 1.53630600  | 5.63234100  |
| H | -0.79493200 | 1.81049000  | 6.98067000  |
| H | 0.59967800  | 0.74799700  | 7.18009300  |
| H | -1.93980100 | 0.37666000  | 2.74665700  |
| H | -2.55341700 | 1.51567000  | 3.94737700  |
| H | -0.81844000 | 1.36373900  | 3.68312400  |
| N | -0.16287500 | -2.59930200 | 2.37273200  |
| C | 1.05241600  | -3.02985400 | 0.77858700  |
| O | 1.49463700  | -4.10111800 | 0.81620100  |

#### IV (large core)

H= -1736.884702 au

|    |             |             |             |
|----|-------------|-------------|-------------|
| U  | -0.20657500 | -0.72468200 | 0.06061300  |
| C  | -2.50173800 | 0.70541900  | -0.35204000 |
| C  | -1.75611000 | 0.88497700  | -1.55149600 |
| C  | -1.11049200 | 0.04111000  | -2.48145500 |
| C  | -0.79749200 | -1.32600200 | -2.57166000 |
| C  | -1.13095300 | -2.47903500 | -1.81884900 |
| C  | -2.02535000 | -2.73368100 | -0.74984800 |
| C  | -2.76763600 | -1.87115400 | 0.09980000  |
| C  | -2.94535100 | -0.48385200 | 0.29547300  |
| C  | 1.55032200  | 1.42664200  | 0.22155800  |
| C  | 1.71606200  | 0.99111900  | -1.12874800 |
| C  | 2.09208300  | 0.42155600  | 1.07189900  |
| C  | 2.55707900  | -0.65430200 | 0.25160500  |
| C  | 2.31967400  | -0.30097700 | -1.10875200 |
| O  | -0.14231500 | -1.21677000 | 2.45971400  |
| H  | -3.26628400 | -2.42451600 | 0.89355800  |
| H  | -3.52420500 | -0.28373100 | 1.19455400  |
| Si | -3.26480100 | 2.30042600  | 0.30247600  |
| H  | -3.62130300 | 2.17192600  | 1.74770000  |
| H  | -1.59523900 | 1.93372200  | -1.79825700 |
| H  | -0.59963500 | 0.61850300  | -3.24577800 |
| H  | -0.09683700 | -1.54305900 | -3.37390400 |
| H  | -0.61770800 | -3.36722400 | -2.18091600 |
| H  | -3.66931900 | -4.93875600 | -0.99369400 |
| Si | -2.33710600 | -4.56972300 | -0.40889200 |
| H  | -2.41064000 | -4.84914700 | 1.05626400  |
| H  | -1.29838400 | -5.41362300 | -1.06656600 |
| C  | 2.81202500  | -1.06573300 | -2.30220900 |
| C  | 3.35409100  | -1.84128400 | 0.70163600  |
| C  | 2.30477500  | 0.57076100  | 2.54362200  |
| C  | 1.56348800  | 1.87512600  | -2.32792600 |
| C  | 1.08459600  | 2.79283100  | 0.63554700  |

|    |             |             |             |
|----|-------------|-------------|-------------|
| H  | -4.51599900 | 2.63057000  | -0.45162200 |
| H  | -2.32215200 | 3.45032700  | 0.12555500  |
| U  | 0.19440900  | -2.26173100 | 4.82439300  |
| C  | 2.89065700  | -2.04208100 | 5.40903600  |
| C  | 2.20170900  | -2.03419800 | 6.65834300  |
| C  | 1.30634100  | -2.91256400 | 7.29913300  |
| C  | 0.52110600  | -4.01914500 | 6.92224200  |
| C  | 0.34616900  | -4.78671800 | 5.74921000  |
| C  | 1.07611500  | -4.91133100 | 4.52963000  |
| C  | 2.15208300  | -4.16158700 | 4.01061800  |
| C  | 2.86831100  | -2.98431300 | 4.34833400  |
| C  | -1.08188600 | -0.16546000 | 6.21662600  |
| C  | -1.48713100 | -1.31478200 | 6.95940500  |
| C  | -1.69268400 | -0.23954000 | 4.93175600  |
| C  | -2.43597900 | -1.45850400 | 4.86340300  |
| C  | -2.30388900 | -2.12519700 | 6.11637500  |
| H  | 2.42591600  | -4.48552900 | 3.00837900  |
| H  | 3.55151800  | -2.71325800 | 3.54767600  |
| Si | 4.27188900  | -0.75865400 | 5.34403900  |
| H  | 4.86759300  | -0.68476100 | 3.97661400  |
| H  | 2.43524400  | -1.17108900 | 7.28075600  |
| H  | 1.03088000  | -2.54939400 | 8.28413400  |
| H  | -0.20436700 | -4.27910900 | 7.68937100  |
| H  | -0.47415000 | -5.49612700 | 5.84888200  |
| H  | 0.35895100  | -7.56057800 | 4.36194800  |
| Si | 0.47956600  | -6.36370200 | 3.46486100  |
| H  | 1.46702000  | -6.66429500 | 2.39112200  |
| H  | -0.87424600 | -6.13109000 | 2.87591000  |
| C  | -3.05943600 | -3.34838700 | 6.54599800  |
| C  | -3.34014600 | -1.87627800 | 3.74583300  |
| C  | -1.72242300 | 0.86752800  | 3.92584500  |
| C  | -1.34082800 | -1.47859800 | 8.44040600  |
| C  | -0.32564700 | 1.00828300  | 6.76978900  |
| H  | 5.35505400  | -1.13532800 | 6.30717900  |
| H  | 3.77605700  | 0.59627700  | 5.74653800  |
| H  | 3.18562100  | -2.71763800 | 0.07043700  |
| H  | 4.42855900  | -1.61605400 | 0.67849700  |
| H  | 3.09720600  | -2.12648600 | 1.72189100  |
| H  | 2.37153900  | -0.40108400 | 3.03650600  |
| H  | 3.23753600  | 1.11274600  | 2.74305800  |
| H  | 1.49448400  | 1.12872800  | 3.02150500  |
| H  | 0.77659600  | 2.81955400  | 1.68446000  |
| H  | 1.88798300  | 3.53194500  | 0.51742500  |
| H  | 0.23667400  | 3.13826100  | 0.03578600  |
| H  | 1.53935600  | 1.30743300  | -3.26087100 |
| H  | 0.66450200  | 2.49667100  | -2.28234000 |
| H  | 2.42106500  | 2.55820800  | -2.39064400 |
| H  | 2.78449200  | -2.14624500 | -2.13547000 |
| H  | 2.22080700  | -0.85498300 | -3.19715400 |
| H  | 3.85271400  | -0.80040900 | -2.52985800 |
| H  | -3.54706300 | -2.94977900 | 3.76683700  |
| H  | -4.30566500 | -1.35706100 | 3.80603000  |
| H  | -2.89000600 | -1.64744800 | 2.78023100  |
| H  | -3.26487900 | -4.01999500 | 5.70786300  |
| H  | -2.51548500 | -3.92218500 | 7.30143800  |
| H  | -4.02772300 | -3.07319200 | 6.98419300  |
| H  | -1.28778000 | -2.52695500 | 8.74717800  |
| H  | -0.45985900 | -0.96241200 | 8.83078800  |
| H  | -2.21446000 | -1.04477900 | 8.94538100  |
| H  | 0.13277400  | 1.60705600  | 5.97781200  |

|   |             |             |            |
|---|-------------|-------------|------------|
| H | -0.99218400 | 1.67572800  | 7.33159500 |
| H | 0.47321500  | 0.70013600  | 7.45139300 |
| H | -1.93185400 | 0.48813600  | 2.92524100 |
| H | -2.50421700 | 1.59431000  | 4.18156300 |
| H | -0.77622500 | 1.41635900  | 3.88304900 |
| N | -0.11800400 | -2.66514500 | 2.41799200 |
| C | 0.37797300  | -3.14794800 | 1.30464000 |
| O | 0.68723600  | -4.25676300 | 0.91096100 |

**TS<sub>IV-V</sub> (large core)**

H= -1736.875451 au

|    |             |             |             |
|----|-------------|-------------|-------------|
| U  | -0.14756800 | -0.75233200 | 0.17385700  |
| C  | -2.38726800 | 0.53718100  | -0.68145800 |
| C  | -1.57272900 | 0.50361300  | -1.84940200 |
| C  | -0.80721800 | -0.46009600 | -2.53255300 |
| C  | -0.45105700 | -1.80720200 | -2.32075200 |
| C  | -0.92939200 | -2.83521800 | -1.46998500 |
| C  | -1.93916800 | -2.90455500 | -0.48557200 |
| C  | -2.73354200 | -1.91958000 | 0.16300900  |
| C  | -2.88469600 | -0.51978900 | 0.13991900  |
| C  | 1.33020000  | 1.60540500  | 0.51189500  |
| C  | 1.50492300  | 1.30353400  | -0.87282400 |
| C  | 2.02299300  | 0.61191900  | 1.26337900  |
| C  | 2.59180100  | -0.32568900 | 0.34873800  |
| C  | 2.26930900  | 0.10076900  | -0.97211200 |
| O  | -0.00582400 | -1.36170200 | 2.47211100  |
| H  | -3.31011000 | -2.34740600 | 0.97933900  |
| H  | -3.53058300 | -0.17115900 | 0.94457500  |
| Si | -3.16048400 | 2.21633300  | -0.31518400 |
| H  | -3.37840400 | 2.39361400  | 1.15448500  |
| H  | -1.41619000 | 1.49187200  | -2.27519600 |
| H  | -0.22174500 | -0.01093900 | -3.33087600 |
| H  | 0.35096300  | -2.14217900 | -2.97361400 |
| H  | -0.38964700 | -3.76821500 | -1.61725300 |
| H  | -3.37095200 | -5.26773900 | -0.77075300 |
| Si | -2.30729400 | -4.66518200 | 0.09805600  |
| H  | -2.82985700 | -4.66402200 | 1.49894200  |
| H  | -1.09249400 | -5.52431500 | -0.00449000 |
| C  | 2.82866900  | -0.48538300 | -2.23424600 |
| C  | 3.54426900  | -1.43214400 | 0.69034300  |
| C  | 2.29560000  | 0.67539500  | 2.73115300  |
| C  | 1.21478700  | 2.24798200  | -1.99861100 |
| C  | 0.73603100  | 2.87391200  | 1.05391100  |
| H  | -4.49056700 | 2.35580600  | -0.99002000 |
| H  | -2.28183200 | 3.31987600  | -0.81737400 |
| U  | 0.16759900  | -2.41218000 | 4.64753100  |
| C  | 2.89009000  | -2.43777200 | 5.14317800  |
| C  | 2.23162300  | -2.26876200 | 6.40083100  |
| C  | 1.30811700  | -3.02795000 | 7.14866600  |
| C  | 0.42533900  | -4.09176100 | 6.89346100  |
| C  | 0.11566900  | -4.89352800 | 5.77741300  |
| C  | 0.77090000  | -5.15189300 | 4.53567100  |
| C  | 1.90978400  | -4.57146700 | 3.93986900  |
| C  | 2.74977400  | -3.45016300 | 4.16208900  |
| C  | -0.94537900 | -0.17911000 | 5.97087900  |
| C  | -1.36137600 | -1.25792100 | 6.80691100  |
| C  | -1.64539100 | -0.29105600 | 4.73429000  |
| C  | -2.44459500 | -1.47235200 | 4.78320900  |
| C  | -2.26391300 | -2.07320000 | 6.06392600  |
| H  | 2.11489500  | -4.98873100 | 2.95572900  |

|    |             |             |             |
|----|-------------|-------------|-------------|
| H  | 3.41272100  | -3.30404500 | 3.31144600  |
| Si | 4.41001200  | -1.33387100 | 4.99073300  |
| H  | 4.89283200  | -1.24736800 | 3.58061800  |
| H  | 2.55924000  | -1.38394700 | 6.94534600  |
| H  | 1.11616800  | -2.57395600 | 8.11557400  |
| H  | -0.27694700 | -4.24018400 | 7.71039300  |
| H  | -0.76999000 | -5.50480000 | 5.94394400  |
| H  | 0.50953200  | -7.90295700 | 4.16455400  |
| Si | 0.02538500  | -6.60657100 | 3.58753900  |
| H  | 0.40953700  | -6.55635400 | 2.14806600  |
| H  | -1.46612100 | -6.59936000 | 3.72071000  |
| C  | -3.07009700 | -3.21549800 | 6.60727500  |
| C  | -3.46815600 | -1.90058100 | 3.77659600  |
| C  | -1.68880200 | 0.77286600  | 3.68270300  |
| C  | -1.15029400 | -1.33363400 | 8.28758200  |
| C  | -0.10267800 | 0.98664800  | 6.40295100  |
| H  | 5.52148000  | -1.89314600 | 5.82470300  |
| H  | 4.11738400  | 0.04203200  | 5.50335900  |
| H  | 3.41106200  | -2.31402800 | 0.05797300  |
| H  | 4.58218100  | -1.09322600 | 0.57399900  |
| H  | 3.42312100  | -1.75366000 | 1.72592600  |
| H  | 2.29540300  | -0.31710300 | 3.18875900  |
| H  | 3.27735500  | 1.12743300  | 2.91913400  |
| H  | 1.55577300  | 1.28396700  | 3.25756700  |
| H  | 0.33057100  | 2.74558700  | 2.06117400  |
| H  | 1.49460500  | 3.66564800  | 1.11161100  |
| H  | -0.07424200 | 3.24944500  | 0.42287000  |
| H  | 1.04320500  | 1.73220700  | -2.94656500 |
| H  | 0.34816100  | 2.88207100  | -1.79578800 |
| H  | 2.07379800  | 2.91544700  | -2.14917700 |
| H  | 2.99017100  | -1.56340600 | -2.14645500 |
| H  | 2.17323700  | -0.31435400 | -3.09260400 |
| H  | 3.79943400  | -0.03087400 | -2.47228700 |
| H  | -3.49724600 | -2.98672300 | 3.64114200  |
| H  | -4.47364400 | -1.58603200 | 4.08504400  |
| H  | -3.26578000 | -1.45580700 | 2.80294300  |
| H  | -3.39438500 | -3.89890800 | 5.81744100  |
| H  | -2.51292700 | -3.80148400 | 7.34343800  |
| H  | -3.97596200 | -2.84637100 | 7.10629700  |
| H  | -1.13754800 | -2.36145900 | 8.66074400  |
| H  | -0.22576400 | -0.84323900 | 8.60289100  |
| H  | -1.97449000 | -0.81982500 | 8.80067500  |
| H  | 0.36606400  | 1.48757000  | 5.55111300  |
| H  | -0.70739700 | 1.73950500  | 6.92578500  |
| H  | 0.69803200  | 0.68409500  | 7.08466900  |
| H  | -2.11554600 | 0.40381400  | 2.74858000  |
| H  | -2.30957000 | 1.61452000  | 4.01656000  |
| H  | -0.69599700 | 1.17326200  | 3.45657100  |
| N  | 0.03841500  | -3.02568700 | 2.18962500  |
| C  | 0.83464200  | -3.28150900 | 1.23553300  |
| O  | 1.45294800  | -4.11120200 | 0.60639800  |

V (large core)

H= -1569.006234 au

|    |             |             |            |
|----|-------------|-------------|------------|
| U  | 4.93141700  | 21.47059900 | 7.11706800 |
| U  | 6.76201000  | 25.27732800 | 6.36545200 |
| Si | 5.61178600  | 26.29667600 | 2.39976900 |
| Si | 10.73774100 | 26.99494200 | 7.09240500 |
| Si | 6.03132500  | 19.01962000 | 3.82122600 |
| Si | 0.97790200  | 20.19257700 | 8.50316200 |

|   |             |             |             |
|---|-------------|-------------|-------------|
| O | 5.85319200  | 23.44057800 | 7.08339700  |
| C | 6.87948000  | 25.77442100 | 3.69390700  |
| C | 7.66388900  | 26.84389700 | 4.21642700  |
| H | 7.30808900  | 27.81754700 | 3.88582300  |
| C | 8.70719100  | 26.98910500 | 5.15248900  |
| H | 8.93444600  | 28.04278400 | 5.30751700  |
| C | 9.40324700  | 26.15118800 | 6.06122500  |
| C | 9.43109600  | 24.72868700 | 6.22304100  |
| H | 10.07757000 | 24.39399200 | 7.03374000  |
| C | 8.86770900  | 23.64880000 | 5.51780500  |
| H | 9.16856800  | 22.68945200 | 5.93033200  |
| C | 7.88960400  | 23.50193600 | 4.50872900  |
| H | 7.63598200  | 22.45602900 | 4.35155900  |
| C | 7.02783000  | 24.35566800 | 3.79997600  |
| H | 6.28831000  | 23.80092200 | 3.22597300  |
| C | 4.78384600  | 19.99969300 | 4.83966700  |
| C | 3.99537200  | 19.21270300 | 5.72933800  |
| H | 4.33831700  | 18.18157600 | 5.78382600  |
| C | 2.96401700  | 19.44234500 | 6.66185200  |
| H | 2.73056100  | 18.52673100 | 7.20287800  |
| C | 2.28666700  | 20.56822400 | 7.19787500  |
| C | 2.26658800  | 21.94657700 | 6.81029600  |
| H | 1.63756800  | 22.57023900 | 7.44497000  |
| C | 2.82265300  | 22.67351400 | 5.74102900  |
| H | 2.53334800  | 23.72082700 | 5.76403000  |
| C | 3.78798000  | 22.41823400 | 4.74094100  |
| H | 4.04191400  | 23.32472600 | 4.19598200  |
| C | 4.64015200  | 21.35414600 | 4.40119900  |
| H | 5.37462200  | 21.64581900 | 3.65323100  |
| C | 5.71574800  | 21.13349100 | 9.78047900  |
| C | 6.92928600  | 21.34753000 | 9.06071500  |
| C | 7.16197800  | 20.20625300 | 8.23860200  |
| C | 6.11126800  | 19.26832700 | 8.48026900  |
| C | 5.21891200  | 19.84228600 | 9.43062000  |
| C | 7.87198800  | 22.49131800 | 9.26214900  |
| H | 7.33946400  | 23.41109600 | 9.51482000  |
| H | 8.46659200  | 22.69358800 | 8.36763400  |
| H | 8.57062800  | 22.27790500 | 10.08168800 |
| C | 8.39719100  | 19.93232500 | 7.42889800  |
| H | 9.13266200  | 19.36580200 | 8.01521100  |
| H | 8.88806000  | 20.85534700 | 7.10978300  |
| H | 8.18437200  | 19.34485900 | 6.53023000  |
| C | 6.10082300  | 17.84029000 | 8.02559700  |
| H | 6.56247900  | 17.71331600 | 7.04293700  |
| H | 5.08872000  | 17.43036200 | 7.97467600  |
| H | 6.66649000  | 17.21580700 | 8.73028800  |
| C | 4.10234000  | 19.12409100 | 10.12555800 |
| H | 4.48219600  | 18.58954600 | 11.00667400 |
| H | 3.62423900  | 18.38283600 | 9.48097500  |
| H | 3.32583700  | 19.80856400 | 10.47831600 |
| C | 5.16772000  | 22.00208000 | 10.87655700 |
| H | 4.07333500  | 21.99057100 | 10.91282100 |
| H | 5.48332400  | 23.04254900 | 10.76716500 |
| C | 5.95678300  | 26.56381000 | 8.72133700  |
| C | 6.49603900  | 27.62822000 | 7.94041800  |
| C | 5.62828700  | 27.84506300 | 6.83124000  |
| C | 4.55106100  | 26.90993000 | 6.92426800  |
| C | 4.74293600  | 26.13624400 | 8.10648000  |
| C | 6.46024100  | 26.14001600 | 10.07132800 |
| H | 7.55054300  | 26.04109000 | 10.10726900 |

|   |             |             |             |
|---|-------------|-------------|-------------|
| H | 6.02949900  | 25.18385500 | 10.37787700 |
| H | 6.18331900  | 26.87555900 | 10.83818200 |
| C | 7.63566000  | 28.50982900 | 8.35117900  |
| H | 8.13183700  | 28.96872800 | 7.49293800  |
| H | 8.39405500  | 27.96536800 | 8.92097200  |
| H | 7.27669800  | 29.32577100 | 8.99284200  |
| C | 5.68914800  | 29.01002200 | 5.88999900  |
| H | 5.11758700  | 29.85566600 | 6.29557700  |
| H | 5.26439300  | 28.77516800 | 4.91045600  |
| H | 6.71326700  | 29.35916100 | 5.73361300  |
| C | 3.33012800  | 26.90849200 | 6.04845700  |
| H | 2.84887900  | 25.92737100 | 6.01296100  |
| H | 3.56104000  | 27.19767800 | 5.01887400  |
| H | 2.57996700  | 27.61905500 | 6.41996200  |
| C | 3.77200400  | 25.16081600 | 8.69329400  |
| H | 3.02000700  | 24.85373500 | 7.96329700  |
| H | 3.24076300  | 25.60423100 | 9.54506700  |
| H | 4.27274300  | 24.25490500 | 9.04802900  |
| H | 12.09523100 | 26.64133900 | 6.56603900  |
| H | 10.59730200 | 28.48211000 | 7.04805800  |
| H | 10.69528500 | 26.53828700 | 8.51976000  |
| H | 5.09009800  | 27.67003200 | 2.68532900  |
| H | 6.21758200  | 26.31962300 | 1.03018200  |
| H | 4.46392600  | 25.33606100 | 2.37201900  |
| H | -0.39265300 | 20.38232000 | 7.92848800  |
| H | 1.08815400  | 18.78329000 | 8.98734900  |
| H | 1.08634900  | 21.12316400 | 9.67390800  |
| H | 6.53499100  | 17.83526600 | 4.58422700  |
| H | 5.41293200  | 18.51218700 | 2.55494300  |
| H | 7.19325800  | 19.88432900 | 3.44304200  |
| H | 5.52296000  | 21.66263300 | 11.85858800 |

#### VI (small core, singlet)

H= -1354.429401 au

|    |             |             |             |
|----|-------------|-------------|-------------|
| U  | -0.40030300 | -0.42752300 | -0.26860700 |
| C  | -2.81534000 | 0.68808500  | -0.26957000 |
| C  | -2.14986300 | 1.15796000  | -1.43506800 |
| C  | -1.51192200 | 0.55493000  | -2.53839600 |
| C  | -1.14009300 | -0.75619600 | -2.88560700 |
| C  | -1.18963600 | -2.01344600 | -2.25620900 |
| C  | -1.77088300 | -2.52149100 | -1.06020300 |
| C  | -2.60559000 | -1.92044200 | -0.07559400 |
| C  | -3.04426400 | -0.61893000 | 0.23121600  |
| C  | 1.71670600  | 1.21130500  | -0.34303200 |
| C  | 1.72026700  | 0.54987600  | -1.61294500 |
| C  | 2.07724800  | 0.25871700  | 0.65218000  |
| C  | 2.23947900  | -1.00115000 | 0.01430100  |
| C  | 2.03082600  | -0.82447200 | -1.38548500 |
| H  | -2.85752200 | -2.60635500 | 0.73163400  |
| H  | -3.53959600 | -0.60825400 | 1.20017500  |
| Si | -3.54941200 | 2.06884500  | 0.79535100  |
| H  | -3.71396200 | 1.60977000  | 2.20710000  |
| H  | -2.08898600 | 2.24513100  | -1.48619000 |
| H  | -1.12596500 | 1.28871000  | -3.24155100 |
| H  | -0.53909300 | -0.77895000 | -3.79223200 |
| H  | -0.58909400 | -2.74943000 | -2.78765600 |
| H  | -2.56329700 | -5.17781200 | -1.46423300 |
| Si | -1.49083600 | -4.37297400 | -0.79818700 |
| H  | -1.49834600 | -4.70184900 | 0.66007200  |
| H  | -0.17864400 | -4.78175900 | -1.39203800 |

|   |             |             |             |
|---|-------------|-------------|-------------|
| C | 2.29150400  | -1.85766800 | -2.44284400 |
| C | 2.62860500  | -2.28204200 | 0.69435100  |
| C | 2.38535200  | 0.56773400  | 2.08502100  |
| C | 1.70299900  | 1.24136000  | -2.94353300 |
| C | 1.55094500  | 2.68822700  | -0.12151900 |
| H | -4.89078600 | 2.48593500  | 0.27527500  |
| H | -2.65982800 | 3.27261900  | 0.75847400  |
| H | 2.32447400  | -3.16090700 | 0.11762100  |
| H | 3.71722000  | -2.34554000 | 0.82062400  |
| H | 2.18316400  | -2.36760700 | 1.69045900  |
| H | 2.30853900  | -0.31843800 | 2.71850600  |
| H | 3.41089000  | 0.94982000  | 2.17296000  |
| H | 1.71609900  | 1.32577600  | 2.50028000  |
| H | 1.17401500  | 2.91069800  | 0.88129300  |
| H | 2.50936300  | 3.21412100  | -0.22754100 |
| H | 0.85940000  | 3.13802000  | -0.84057600 |
| H | 1.32472700  | 0.59956700  | -3.74357500 |
| H | 1.09332100  | 2.14916500  | -2.92863600 |
| H | 2.71974800  | 1.54455900  | -3.22758300 |
| H | 2.00980400  | -2.86388100 | -2.11803800 |
| H | 1.74545900  | -1.64500700 | -3.36561500 |
| H | 3.35917100  | -1.88895300 | -2.69759700 |
| N | -0.43213900 | -0.52554200 | 1.97833300  |
| C | -0.62046700 | -0.58695700 | 3.17047200  |
| O | -0.80091400 | -0.65102800 | 4.33854200  |

#### VI (small core, triplet)

H= -1354.472731 au

|    |             |             |             |
|----|-------------|-------------|-------------|
| U  | -0.42133900 | -0.39224700 | -0.24097700 |
| C  | -2.87596500 | 0.67067000  | -0.28875400 |
| C  | -2.20133700 | 1.14969900  | -1.44483400 |
| C  | -1.52757400 | 0.54783500  | -2.52840800 |
| C  | -1.13055000 | -0.76045200 | -2.86134900 |
| C  | -1.17392700 | -2.01625900 | -2.22726600 |
| C  | -1.76023300 | -2.53043800 | -1.03837200 |
| C  | -2.59004100 | -1.92993500 | -0.05199300 |
| C  | -3.06341500 | -0.63333100 | 0.23430600  |
| C  | 1.77896800  | 1.21580600  | -0.33999700 |
| C  | 1.77239500  | 0.57236800  | -1.61506300 |
| C  | 2.08858400  | 0.23756200  | 0.64705400  |
| C  | 2.20841500  | -1.02205400 | -0.00752100 |
| C  | 2.03052300  | -0.81173500 | -1.40915400 |
| H  | -2.83124600 | -2.61026000 | 0.76311900  |
| H  | -3.56392900 | -0.62295600 | 1.20033400  |
| Si | -3.65130400 | 2.04682900  | 0.75304200  |
| H  | -3.85559900 | 1.58771700  | 2.15936400  |
| H  | -2.17548900 | 2.23696900  | -1.51238100 |
| H  | -1.13681300 | 1.28424500  | -3.22633200 |
| H  | -0.51901800 | -0.78163900 | -3.76070300 |
| H  | -0.56528000 | -2.74758500 | -2.75627000 |
| H  | -2.49574400 | -5.20262200 | -1.43964900 |
| Si | -1.44869700 | -4.37434300 | -0.76140600 |
| H  | -1.47261900 | -4.69724500 | 0.69796100  |
| H  | -0.12114800 | -4.76564800 | -1.33322500 |
| C  | 2.26754700  | -1.83742200 | -2.47808700 |
| C  | 2.58902500  | -2.31787000 | 0.65042600  |
| C  | 2.41594000  | 0.51900100  | 2.08190300  |
| C  | 1.73215200  | 1.27757300  | -2.93756400 |
| C  | 1.63891300  | 2.69240900  | -0.09980100 |
| H  | -4.97849300 | 2.45312500  | 0.18989100  |

|   |             |             |             |
|---|-------------|-------------|-------------|
| H | -2.77138800 | 3.25845000  | 0.74253900  |
| H | 2.25018600  | -3.18521700 | 0.07577000  |
| H | 3.67919400  | -2.40586500 | 0.74712200  |
| H | 2.16834900  | -2.40369800 | 1.65684600  |
| H | 2.28252100  | -0.36296400 | 2.71169400  |
| H | 3.46419800  | 0.83351600  | 2.17047400  |
| H | 1.79748800  | 1.31653500  | 2.50165900  |
| H | 1.26508800  | 2.90868500  | 0.90550200  |
| H | 2.60595300  | 3.20330700  | -0.19826100 |
| H | 0.95580000  | 3.16310100  | -0.81399800 |
| H | 1.34488700  | 0.64093500  | -3.73731000 |
| H | 1.11924700  | 2.18283800  | -2.90473600 |
| H | 2.74331100  | 1.58724300  | -3.23349100 |
| H | 1.95342800  | -2.83807000 | -2.16688800 |
| H | 1.73709900  | -1.59745300 | -3.40342700 |
| H | 3.33608100  | -1.89825400 | -2.72337300 |
| N | -0.46064000 | -0.42841200 | 2.01096800  |
| C | -0.62314000 | -0.49150300 | 3.20652600  |
| O | -0.77782200 | -0.55461100 | 4.37847200  |

#### VI (small core, quintet)

H= -1354.412449 au

|    |             |             |             |
|----|-------------|-------------|-------------|
| U  | -0.26801200 | -0.32419500 | -0.12910500 |
| C  | -3.04302200 | 0.62538100  | -0.28907900 |
| C  | -2.26837700 | 1.14448700  | -1.40448300 |
| C  | -1.61678200 | 0.56470000  | -2.48229500 |
| C  | -1.25127700 | -0.77338500 | -2.84590800 |
| C  | -1.29294500 | -2.00748800 | -2.22155600 |
| C  | -1.80098800 | -2.53062800 | -0.96961300 |
| C  | -2.63672000 | -1.95256600 | -0.00780900 |
| C  | -3.19068200 | -0.64860700 | 0.24121900  |
| C  | 1.95382400  | 1.21105900  | -0.31648500 |
| C  | 1.85818600  | 0.58443500  | -1.59760400 |
| C  | 2.27009000  | 0.20829400  | 0.64369100  |
| C  | 2.34293700  | -1.04418600 | -0.03744900 |
| C  | 2.09945200  | -0.80962700 | -1.42309500 |
| H  | -2.90418800 | -2.63393200 | 0.79822000  |
| H  | -3.80679400 | -0.67247100 | 1.13752000  |
| Si | -3.99495300 | 1.99365700  | 0.61484800  |
| H  | -4.63477900 | 1.44920400  | 1.84726100  |
| H  | -2.28164300 | 2.23257200  | -1.46483900 |
| H  | -1.23968600 | 1.29604700  | -3.19407200 |
| H  | -0.72708900 | -0.80279600 | -3.79848800 |
| H  | -0.77456300 | -2.76687600 | -2.80716300 |
| H  | -2.28575200 | -5.20609600 | -1.63439800 |
| Si | -1.43987300 | -4.37177400 | -0.72165800 |
| H  | -1.72554300 | -4.75642800 | 0.69237000  |
| H  | -0.01047000 | -4.67688800 | -1.04526700 |
| C  | 2.25238200  | -1.82371500 | -2.51946700 |
| C  | 2.75446600  | -2.35059800 | 0.58034700  |
| C  | 2.62788100  | 0.44776100  | 2.08063900  |
| C  | 1.75062500  | 1.30495900  | -2.91083800 |
| C  | 1.86843900  | 2.68743400  | -0.05126800 |
| H  | -5.04724300 | 2.56119600  | -0.28621200 |
| H  | -3.06387500 | 3.11065800  | 0.97052600  |
| H  | 2.39093500  | -3.20934100 | 0.00732400  |
| H  | 3.84839900  | -2.43925800 | 0.62766800  |
| H  | 2.38197600  | -2.45569800 | 1.60435100  |
| H  | 2.40249500  | -0.41797100 | 2.70820800  |
| H  | 3.70106200  | 0.65892700  | 2.18168700  |



|   |             |             |             |
|---|-------------|-------------|-------------|
| H | 2.08625300  | 1.29844200  | 2.50297300  |
| H | 1.52334800  | 2.90023700  | 0.96549600  |
| H | 2.84820600  | 3.17163600  | -0.16297200 |
| H | 1.18588900  | 3.19213100  | -0.74330600 |
| H | 1.30795800  | 0.67993500  | -3.69225200 |
| H | 1.14848100  | 2.21599100  | -2.83497000 |
| H | 2.74240500  | 1.61034300  | -3.27086800 |
| H | 1.93202200  | -2.82254300 | -2.20624000 |
| H | 1.67387400  | -1.55721700 | -3.40875600 |
| H | 3.30168400  | -1.90924000 | -2.83257400 |
| N | -0.48478900 | -0.27520400 | 2.15952400  |
| C | -0.63856000 | -0.27225600 | 3.35681400  |
| O | -0.79212100 | -0.27217500 | 4.53378500  |

### VI (large core)

H= -914.920256 au

|    |             |             |             |
|----|-------------|-------------|-------------|
| U  | -0.36357000 | -0.51381200 | -0.24751900 |
| C  | -2.75395300 | 0.75640800  | -0.02497500 |
| C  | -2.09235000 | 1.31370100  | -1.16503700 |
| C  | -1.58540600 | 0.78346100  | -2.37556700 |
| C  | -1.29261500 | -0.50366400 | -2.86741200 |
| C  | -1.36330200 | -1.82264400 | -2.36110800 |
| C  | -1.99553300 | -2.43777500 | -1.23320100 |
| C  | -2.75559200 | -1.88058500 | -0.17179400 |
| C  | -3.06445200 | -0.58620200 | 0.31376000  |
| C  | 1.74327700  | 1.27351100  | -0.58192600 |
| C  | 1.85491900  | 0.39114500  | -1.70203600 |
| C  | 2.04256000  | 0.52712100  | 0.59525200  |
| C  | 2.33664300  | -0.81823700 | 0.20429500  |
| C  | 2.21493900  | -0.90345500 | -1.21350900 |
| H  | -3.06771800 | -2.63198200 | 0.55064900  |
| H  | -3.53968800 | -0.66375100 | 1.28985400  |
| Si | -3.41467500 | 2.04259600  | 1.19290400  |
| H  | -3.45883200 | 1.48175200  | 2.57636400  |
| H  | -1.98821200 | 2.39605700  | -1.12069400 |
| H  | -1.19771000 | 1.56330000  | -3.02674300 |
| H  | -0.73719200 | -0.46013200 | -3.80075200 |
| H  | -0.84120000 | -2.52956400 | -3.00331700 |
| H  | -2.95514400 | -4.92984200 | -2.06957700 |
| Si | -1.88095800 | -4.32436700 | -1.21991400 |
| H  | -2.02925200 | -4.84425700 | 0.17215300  |
| H  | -0.56299000 | -4.75899000 | -1.78157900 |
| C  | 2.56973000  | -2.08963100 | -2.06424900 |
| C  | 2.83051600  | -1.90103600 | 1.11650000  |
| C  | 2.16269700  | 1.07289900  | 1.98742500  |
| C  | 1.86231200  | 0.80910600  | -3.14124300 |
| C  | 1.52225400  | 2.75695700  | -0.66420400 |
| H  | -4.79926900 | 2.46945400  | 0.81426100  |
| H  | -2.54324300 | 3.25961500  | 1.16843900  |
| H  | 2.59657800  | -2.89984800 | 0.73625500  |
| H  | 3.92116900  | -1.84375700 | 1.22576600  |
| H  | 2.38845300  | -1.81868300 | 2.11159600  |
| H  | 1.82476200  | 0.34855000  | 2.73264700  |
| H  | 3.20588900  | 1.32642900  | 2.21526100  |
| H  | 1.57334500  | 1.98458100  | 2.12295700  |
| H  | 1.10901200  | 3.16420700  | 0.26273800  |
| H  | 2.46834500  | 3.28114500  | -0.85156300 |
| H  | 0.83908100  | 3.02567600  | -1.47559800 |
| H  | 1.60756100  | -0.01616800 | -3.81108900 |
| H  | 1.16878100  | 1.63043000  | -3.34071700 |

|   |             |             |             |
|---|-------------|-------------|-------------|
| H | 2.86373300  | 1.15735000  | -3.42688300 |
| H | 2.44991100  | -3.03237600 | -1.52321100 |
| H | 1.95384300  | -2.14810000 | -2.96697400 |
| H | 3.61682900  | -2.03699900 | -2.38941200 |
| N | -0.26162500 | -1.25073600 | 1.95987900  |
| C | -0.47670000 | -1.68757000 | 3.06381800  |
| O | -0.67341400 | -2.11495600 | 4.15340800  |

**VII**(large core)

H= -1656.133080 au

|    |             |             |             |
|----|-------------|-------------|-------------|
| U  | 10.84302900 | 7.89126000  | 9.81748600  |
| U  | 11.98184900 | 7.53694200  | 2.60735700  |
| Si | 10.54922100 | 3.69938000  | 9.28960800  |
| Si | 7.18946100  | 9.81486900  | 8.88016100  |
| C  | 10.26709000 | 5.70555800  | 11.22662000 |
| H  | 10.97207800 | 5.00239600  | 11.66591600 |
| C  | 9.23970800  | 7.96641300  | 12.05179900 |
| H  | 9.35148300  | 8.55037800  | 12.96205400 |
| C  | 9.87292000  | 5.36152500  | 9.89519700  |
| C  | 8.61640700  | 8.71384800  | 11.02215000 |
| H  | 8.38017000  | 9.72592600  | 11.34508700 |
| C  | 9.91498900  | 6.73334100  | 12.13612000 |
| H  | 10.41337100 | 6.61152200  | 13.09435700 |
| C  | 9.00438300  | 6.01438500  | 8.98187600  |
| H  | 8.95141000  | 5.49847200  | 8.02509100  |
| C  | 8.32124500  | 7.25275900  | 8.89906400  |
| H  | 7.91161900  | 7.38248100  | 7.89922000  |
| C  | 8.18847400  | 8.42500300  | 9.68797500  |
| C  | 12.70051700 | 10.84050500 | 8.49718000  |
| H  | 12.65013300 | 10.35058600 | 7.52195600  |
| H  | 13.59450700 | 11.47649100 | 8.50089400  |
| H  | 11.83472700 | 11.50423900 | 8.57964000  |
| C  | 14.32723700 | 8.11654100  | 8.45809100  |
| H  | 13.89253900 | 8.37991900  | 7.49174200  |
| H  | 14.45512900 | 7.03048500  | 8.47604400  |
| H  | 15.32923400 | 8.56098100  | 8.50504400  |
| C  | 13.48417300 | 8.60946400  | 9.59581100  |
| C  | 12.47546800 | 8.77745300  | 13.20500700 |
| H  | 12.49588800 | 7.73769500  | 13.54185900 |
| H  | 11.55145600 | 9.23309300  | 13.57115700 |
| H  | 13.30704400 | 9.29295300  | 13.70294300 |
| C  | 14.12165200 | 6.79309500  | 11.36268500 |
| H  | 13.53578800 | 6.21712700  | 12.08582500 |
| H  | 15.06429500 | 7.06589700  | 11.85392000 |
| H  | 14.37451200 | 6.12389400  | 10.53608200 |
| C  | 11.52159300 | 11.23951500 | 11.44994800 |
| H  | 11.01172800 | 11.79154600 | 10.65589700 |
| H  | 12.23797000 | 11.92984400 | 11.91319100 |
| H  | 10.77631100 | 10.98942500 | 12.21099100 |
| C  | 12.22397000 | 10.01913700 | 10.92830000 |
| C  | 13.39435200 | 8.02010400  | 10.89115100 |
| C  | 12.75824200 | 9.84517600  | 9.61829600  |
| C  | 12.61920100 | 8.89217300  | 11.71749300 |
| Si | 14.09974100 | 11.24457100 | 3.21898500  |
| Si | 14.32577500 | 4.41514100  | 4.48712900  |
| O  | 10.99656400 | 7.76861500  | 5.07480200  |
| N  | 11.20417600 | 7.98046200  | 7.45151900  |
| C  | 11.10846700 | 7.87192400  | 6.26877300  |
| C  | 13.91783800 | 9.11787500  | 1.43154000  |
| H  | 13.76144800 | 10.00359000 | 0.81734100  |

|   |             |             |             |
|---|-------------|-------------|-------------|
| C | 13.95481000 | 6.55036000  | 0.90819700  |
| H | 13.81930600 | 5.96431100  | 0.00132500  |
| C | 14.04755500 | 9.41004100  | 2.82274100  |
| C | 14.00383600 | 5.73583300  | 2.06348800  |
| H | 13.89778600 | 4.68053800  | 1.81537900  |
| C | 13.92729800 | 7.94004800  | 0.64982600  |
| H | 13.77604700 | 8.15263500  | -0.40620400 |
| C | 14.24172200 | 8.56907100  | 3.95747900  |
| H | 14.28528600 | 9.13244300  | 4.88985400  |
| C | 14.29173800 | 7.18121500  | 4.21336500  |
| H | 14.36067100 | 6.99333700  | 5.28463300  |
| C | 14.15699600 | 5.97836300  | 3.46138500  |
| C | 8.64162500  | 5.91556900  | 3.45167600  |
| H | 8.65465800  | 6.45258400  | 4.40489800  |
| H | 7.59243000  | 5.67943200  | 3.22743100  |
| H | 9.15341000  | 4.95959300  | 3.60838100  |
| C | 8.54440200  | 9.08973800  | 3.16356400  |
| H | 8.59171000  | 8.74318000  | 4.20017200  |
| H | 8.98669500  | 10.09153100 | 3.13437800  |
| H | 7.48204300  | 9.20600700  | 2.90921600  |
| C | 9.23012400  | 8.14127300  | 2.22188700  |
| C | 10.77683900 | 7.17026300  | -1.06247900 |
| H | 11.34375100 | 8.05813100  | -1.35778300 |
| H | 11.43837300 | 6.30647900  | -1.18032200 |
| H | 9.96115600  | 7.05257600  | -1.78923100 |
| C | 9.89889300  | 9.86679800  | 0.38085600  |
| H | 10.78406400 | 9.99738400  | -0.25008600 |
| H | 9.02247900  | 10.07452900 | -0.24825200 |
| H | 9.93017700  | 10.64746500 | 1.14779500  |
| C | 10.04039500 | 4.73509100  | 0.83671300  |
| H | 10.08214200 | 4.10155100  | 1.72852800  |
| H | 9.19184900  | 4.38103100  | 0.23529400  |
| H | 10.94745700 | 4.53907500  | 0.25574600  |
| C | 9.89600700  | 6.19012000  | 1.18343000  |
| C | 9.83123300  | 8.48919100  | 0.97752800  |
| C | 9.27070500  | 6.71886100  | 2.34933000  |
| C | 10.24186000 | 7.28365000  | 0.33510700  |
| H | 7.69579400  | 11.14021700 | 9.35532900  |
| H | 7.30047700  | 9.73304900  | 7.39341200  |
| H | 5.74521700  | 9.71249900  | 9.25755800  |
| H | 13.83274000 | 4.63430000  | 5.88784300  |
| H | 13.54889700 | 3.28358600  | 3.88364700  |
| H | 15.74901900 | 3.95071900  | 4.60342600  |
| H | 15.49589100 | 11.79718300 | 3.21707000  |
| H | 13.53553700 | 11.51676200 | 4.58309500  |
| H | 13.31611200 | 12.03635000 | 2.21636800  |
| H | 10.65411800 | 3.70061400  | 7.80081300  |
| H | 11.89297300 | 3.45254100  | 9.89787200  |
| H | 9.64191700  | 2.58475500  | 9.70594600  |

### VIII (large core)

H= -1829.868886 au

|    |             |             |             |
|----|-------------|-------------|-------------|
| U  | 10.76311300 | 8.13537400  | 9.31557600  |
| Si | 9.29774400  | 4.13687100  | 9.00759300  |
| Si | 7.80550800  | 10.89139000 | 8.09937200  |
| O  | 11.76464900 | 6.33922700  | 7.74754000  |
| N  | 11.86362800 | 6.38572400  | 5.34456800  |
| C  | 11.81419500 | 6.36795300  | 6.52916100  |
| C  | 9.47065200  | 6.24222800  | 10.82025600 |
| H  | 9.90341600  | 5.39105900  | 11.34388200 |

|    |             |             |             |
|----|-------------|-------------|-------------|
| C  | 9.15045200  | 8.76267900  | 11.44567600 |
| H  | 9.41020300  | 9.34875200  | 12.32385000 |
| C  | 9.07124200  | 5.94858300  | 9.48270300  |
| C  | 8.74482600  | 9.58229300  | 10.37233100 |
| H  | 8.77553800  | 10.63834500 | 10.63454300 |
| C  | 9.43269000  | 7.38927300  | 11.63513600 |
| H  | 9.85060700  | 7.19906100  | 12.61951300 |
| C  | 8.50446100  | 6.76160600  | 8.47143600  |
| H  | 8.35976300  | 6.22047800  | 7.53802800  |
| C  | 8.18473900  | 8.13259400  | 8.29410400  |
| H  | 7.88220800  | 8.31368000  | 7.26513100  |
| C  | 8.31396900  | 9.33269900  | 9.03403700  |
| C  | 13.03855500 | 11.10802700 | 8.75330800  |
| H  | 13.09187000 | 10.89210800 | 7.68475000  |
| H  | 13.93672500 | 11.67770900 | 9.02527800  |
| H  | 12.17733200 | 11.76464100 | 8.90967100  |
| C  | 14.26759000 | 8.28265500  | 7.96802400  |
| H  | 13.80532300 | 8.72439800  | 7.08104700  |
| H  | 14.36111000 | 7.20776900  | 7.79823300  |
| H  | 15.28211200 | 8.69292200  | 8.05130000  |
| C  | 13.48074800 | 8.57649500  | 9.20786200  |
| C  | 12.51300700 | 7.96219500  | 12.77820900 |
| H  | 12.31544000 | 6.88893000  | 12.84649600 |
| H  | 11.70266700 | 8.48536500  | 13.29284300 |
| H  | 13.43322000 | 8.15805800  | 13.34421500 |
| C  | 13.84504400 | 6.29244300  | 10.41421100 |
| H  | 13.34120100 | 5.72126600  | 11.19905100 |
| H  | 14.91644200 | 6.29454300  | 10.65260600 |
| H  | 13.71783100 | 5.74441300  | 9.47640100  |
| C  | 11.96196100 | 10.91065900 | 11.72240400 |
| H  | 11.46979400 | 11.67756000 | 11.11791600 |
| H  | 12.80921000 | 11.39300600 | 12.22722300 |
| H  | 11.25992900 | 10.59888800 | 12.50006900 |
| C  | 12.43652500 | 9.75710400  | 10.88978600 |
| C  | 13.31518300 | 7.69437700  | 10.31947500 |
| C  | 12.94491400 | 9.85189900  | 9.56667200  |
| C  | 12.67334800 | 8.42249700  | 11.36096900 |
| U  | 12.13075500 | 7.40514500  | 3.11252600  |
| Si | 13.95005600 | 11.24846700 | 3.67207000  |
| Si | 14.89440900 | 4.34690700  | 3.99381000  |
| O  | 11.23258500 | 9.24876900  | 4.69625400  |
| N  | 11.04123800 | 9.17944900  | 7.09326800  |
| C  | 11.13545800 | 9.20761900  | 5.91147000  |
| C  | 13.50502700 | 9.31895700  | 1.71799200  |
| H  | 13.11581200 | 10.24094300 | 1.28896100  |
| C  | 13.62670600 | 6.84761300  | 0.87551700  |
| H  | 13.30106200 | 6.35537700  | -0.03824300 |
| C  | 13.99344300 | 9.46931600  | 3.04819500  |
| C  | 14.00011400 | 5.91265000  | 1.86348500  |
| H  | 13.87724800 | 4.88833700  | 1.51675700  |
| C  | 13.42514900 | 8.24537200  | 0.80901900  |
| H  | 12.98455100 | 8.54496600  | -0.13768300 |
| C  | 14.52460000 | 8.53351300  | 3.96953000  |
| H  | 14.75241000 | 8.98707300  | 4.93231700  |
| C  | 14.72875500 | 7.13199900  | 4.03473700  |
| H  | 15.03804000 | 6.84595600  | 5.03780000  |
| C  | 14.47382500 | 6.01045200  | 3.20704600  |
| C  | 9.75268000  | 4.52594300  | 3.72867700  |
| H  | 9.74830500  | 4.74731000  | 4.79758200  |
| H  | 8.81660600  | 4.00406700  | 3.49066900  |

|   |             |             |             |
|---|-------------|-------------|-------------|
| H | 10.57144700 | 3.82376100  | 3.54581900  |
| C | 8.64341800  | 7.39430700  | 4.51707000  |
| H | 9.10415800  | 6.94125700  | 5.39920400  |
| H | 8.58806900  | 8.47241500  | 4.68327000  |
| H | 7.61428000  | 7.01845800  | 4.45114200  |
| C | 9.40063000  | 7.06863100  | 3.26734900  |
| C | 10.33084800 | 7.63031900  | -0.32140300 |
| H | 10.52193500 | 8.70381500  | -0.40030200 |
| H | 11.14289800 | 7.10737700  | -0.83366400 |
| H | 9.41031000  | 7.42382300  | -0.88304400 |
| C | 9.09873100  | 9.35972200  | 2.05947800  |
| H | 9.60104800  | 9.90746800  | 1.25711500  |
| H | 8.02173600  | 9.39659300  | 1.85110800  |
| H | 9.27217400  | 9.90781600  | 2.98994400  |
| C | 10.79808500 | 4.67235100  | 0.74094300  |
| H | 11.26231800 | 3.88754700  | 1.34439700  |
| H | 9.93075500  | 4.22398200  | 0.23899600  |
| H | 11.50945400 | 4.95634700  | -0.03879400 |
| C | 10.37397900 | 5.84394100  | 1.57515300  |
| C | 9.57850000  | 7.93952200  | 2.14908900  |
| C | 9.88361600  | 5.77299100  | 2.90655100  |
| C | 10.17645900 | 7.18422000  | 1.10091500  |
| H | 8.67143200  | 12.04573900 | 8.49754500  |
| H | 7.90496700  | 10.67762800 | 6.62353500  |
| H | 6.38928800  | 11.26812500 | 8.41477600  |
| H | 14.81091900 | 4.43147400  | 5.48336800  |
| H | 13.96225600 | 3.28463100  | 3.49952000  |
| H | 16.28542000 | 3.92143600  | 3.63268900  |
| H | 15.18485800 | 11.98933700 | 3.25386000  |
| H | 13.89030100 | 11.28383900 | 5.16582500  |
| H | 12.77602900 | 11.98200100 | 3.10521000  |
| H | 9.36994500  | 3.98521300  | 7.52212400  |
| H | 10.53660800 | 3.57547200  | 9.63079500  |
| H | 8.14288300  | 3.31320000  | 9.49347500  |

**NO**

H= -129.825383 au

|   |            |            |             |
|---|------------|------------|-------------|
| N | 0.00000000 | 0.00000000 | -0.61599200 |
| O | 0.00000000 | 0.00000000 | 0.53899300  |

**NO<sup>+</sup>**

H= -335.925821 au

|   |            |            |             |
|---|------------|------------|-------------|
| N | 0.00000000 | 0.00000000 | -0.57109000 |
| O | 0.00000000 | 0.00000000 | 0.49970400  |

**NO<sup>-</sup> (triplet)**

H= -129.804457 au

|   |            |            |            |
|---|------------|------------|------------|
| N | 0.00000000 | 0.00000000 | -0.6159900 |
| O | 0.00000000 | 0.00000000 | 0.5389900  |

**NO<sup>2-</sup>**

H= -129.377169 au

|   |            |            |             |
|---|------------|------------|-------------|
| N | 0.00000000 | 0.00000000 | -0.78779100 |
| O | 0.00000000 | 0.00000000 | 0.68931700  |

**CO**

H= -113.249933 au

|   |            |            |             |
|---|------------|------------|-------------|
| C | 0.00000000 | 0.00000000 | -0.64972100 |
| O | 0.00000000 | 0.00000000 | 0.48729100  |

**CNO**

H= -167.914783 au

|   |            |            |             |
|---|------------|------------|-------------|
| O | 0.00000000 | 0.00000000 | 1.14314400  |
| C | 0.00000000 | 0.00000000 | -0.04093300 |
| N | 0.00000000 | 0.00000000 | -1.27136500 |
